# Supplementary material for: Nutritional, Antioxidant, Antimicrobial, and Anticholinesterase Properties of Phyllanthus emblica: A Study Supported by Spectroscopic and Computational Investigations
Source: MDPI journal article supplement (doi:10.3390/metabo13091013), 2023-09-14
Supplement: s1 [file s1]

## Supplementary Materials

# Nutritional, antioxidant, antimicrobial, and anticholinesterase properties of *Phyllanthus emblica*: A study supported by spectroscopic and computational investigations

Mohamed A. A. Orabi <sup>1,\*</sup>, Aso Hameed Hasan <sup>2,3</sup>, Sameh F. AbouZid <sup>4</sup>, Dalia El Amir <sup>4,\*</sup>, Mona H. Hetta <sup>5</sup>, Ahmed Abdullah Al Awadh <sup>6</sup>, Omaish Salman Alqahtani <sup>1</sup>, Tsutomu Hatano <sup>7</sup> and Mohamed A. El-Shanawany <sup>8</sup>

<sup>1</sup> Department of Pharmacognosy, College of Pharmacy, Najran University 1988, Najran 66454, Saudi Arabia; [mohamedorabi@azhar.edu.eg](mailto:mohamedorabi@azhar.edu.eg) (MAAO); [osalqahtani@nu.edu.sa](mailto:osalqahtani@nu.edu.sa) (OSA)

<sup>2</sup> Department of Chemistry, College of Science, University of Garmian, Kalar 46021, Kurdistan Region-Iraq, Iraq; [aso.hameed@garmian.edu.krd](mailto:aso.hameed@garmian.edu.krd)

<sup>3</sup> Department of Chemistry, Faculty of Science, Universiti Teknologi Malaysia, Johor Bahru 81310, Johor, Malaysia

<sup>4</sup> Department of Pharmacognosy, Faculty of Pharmacy, Beni-Suef University, Beni-Suef 62514, Egypt; [sameh.zaid@pharm.bsu.edu.eg](mailto:sameh.zaid@pharm.bsu.edu.eg) (S.F.A.), [dalia.elamir@pharm.bsu.edu.eg](mailto:dalia.elamir@pharm.bsu.edu.eg) (DEA)

<sup>5</sup> Department of Pharmacognosy, Faculty of Pharmacy, Fayoum University - 63514 Fayoum, Egypt; [monahetta@gmail.com](mailto:monahetta@gmail.com)

<sup>6</sup> Department of Clinical Laboratory Sciences, Faculty of Applied Medical Sciences, Najran University, 1988, Najran 66454, Saudi Arabia; [aaalawadh@nu.edu.sa](mailto:aaalawadh@nu.edu.sa)

<sup>7</sup> Graduate School of Medicine, Dentistry and Pharmaceutical Sciences, Okayama University, Tsushima, Okayama 700-8530, Japan; [hatano-t@cc.okayama-u.ac.jp](mailto:hatano-t@cc.okayama-u.ac.jp)

<sup>8</sup> Department of Pharmacognosy, Faculty of Pharmacy, Badr University in Cairo (BUC), Badr City 11829, Egypt; [mohamed.elshanawani@pharm.aun.edu.eg](mailto:mohamed.elshanawani@pharm.aun.edu.eg)

\* Correspondence: [mohamedorabi@azhar.edu.eg](mailto:mohamedorabi@azhar.edu.eg) (MAAO), [Dalia.elamir@pharm.bsu.edu.eg](mailto:Dalia.elamir@pharm.bsu.edu.eg) (DE)

## List of supplementary materials

| Content                                                                                                                                          | Page       |
|--------------------------------------------------------------------------------------------------------------------------------------------------|------------|
| <b>Figure S1.</b> $^1\text{H}$ NMR spectrum of compound <b>1</b> (DMSO- $d_6$ , 400 MHz)                                                         | <b>S4</b>  |
| <b>Figure S2.</b> $^{13}\text{C}$ NMR spectrum of compound <b>1</b> (DMSO- $d_6$ , 100 MHz)                                                      | <b>S5</b>  |
| <b>Figure S3.</b> $^1\text{H}$ NMR spectrum of compound <b>2</b> ( $\text{CD}_3\text{OD}$ , 400MHz)                                              | <b>S6</b>  |
| <b>Figure S4.</b> DPTQ NMR spectrum of compound <b>2</b> ( $\text{CD}_3\text{OD}$ , 100MHz)                                                      | <b>S7</b>  |
| <b>Figure S5.</b> $^1\text{H}$ NMR spectrum of compound <b>3</b> [acetone- $d_6$ / $\text{D}_2\text{O}$ , 9/1, $v/v$ , 600 MHz]                  | <b>S8</b>  |
| <b>Figure S6.</b> $^{13}\text{C}$ NMR spectrum of compound <b>3</b> [acetone- $d_6$ / $\text{D}_2\text{O}$ , 9/1, $v/v$ , 151 MHz]               | <b>S9</b>  |
| <b>Figure S7.</b> HSQC spectrum of compound <b>3</b> [acetone- $d_6$ / $\text{D}_2\text{O}$ , 9/1, $v/v$ , 600 MHz]                              | <b>S10</b> |
| <b>Figure S8.</b> HMBC spectrum of compound <b>3</b> [acetone- $d_6$ / $\text{D}_2\text{O}$ , 9/1, $v/v$ , 600 MHz]                              | <b>S11</b> |
| <b>Figure S9.</b> $^1\text{H}$ NMR spectrum of compound <b>4</b> [acetone- $d_6$ / $\text{D}_2\text{O}$ , 9/1, $v/v$ , 600 MHz]                  | <b>S12</b> |
| <b>Figure S10.</b> $^{13}\text{C}$ NMR spectrum of compound <b>4</b> [acetone- $d_6$ / $\text{D}_2\text{O}$ , 9/1, $v/v$ , 151 MHz]              | <b>S13</b> |
| <b>Figure S11.</b> $^1\text{H}$ - $^1\text{H}$ COSY spectrum of compound <b>4</b> [acetone- $d_6$ / $\text{D}_2\text{O}$ , 9/1, $v/v$ , 600 MHz] | <b>S14</b> |
| <b>Figure S12.</b> HSQC spectrum of compound <b>4</b> [acetone- $d_6$ / $\text{D}_2\text{O}$ , 9/1, $v/v$ , 600 MHz]                             | <b>S15</b> |
| <b>Figure S13.</b> HMBC spectrum of compound <b>4</b> [acetone- $d_6$ / $\text{D}_2\text{O}$ , 9/1, $v/v$ , 600 MHz]                             | <b>S16</b> |
| <b>Figure S14.</b> $^1\text{H}$ NMR spectrum of compound <b>5</b> [acetone- $d_6$ / $\text{D}_2\text{O}$ , 9/1, $v/v$ , 600 MHz]                 | <b>S17</b> |
| <b>Figure S15.</b> $^1\text{H}$ - $^1\text{H}$ COSY spectrum of compound <b>5</b> [acetone- $d_6$ / $\text{D}_2\text{O}$ , 9/1, $v/v$ , 600 MHz] | <b>S18</b> |
| <b>Figure S16.</b> $^1\text{H}$ NMR spectrum of compound <b>6</b> [acetone- $d_6$ / $\text{D}_2\text{O}$ , 9/1, $v/v$ , 600 MHz]                 | <b>S19</b> |
| <b>Figure S17.</b> $^{13}\text{C}$ NMR spectrum of compound <b>6</b> [acetone- $d_6$ / $\text{D}_2\text{O}$ , 9/1, $v/v$ , 151 MHz]              | <b>S20</b> |
| <b>Figure S18.</b> HSQC spectrum of compound <b>6</b> [acetone- $d_6$ / $\text{D}_2\text{O}$ , 9/1, $v/v$ , 600 MHz]                             | <b>S21</b> |
| <b>Figure S19.</b> HMBC spectrum of compound <b>6</b> [acetone- $d_6$ / $\text{D}_2\text{O}$ , 9/1, $v/v$ , 600 MHz]                             | <b>S22</b> |
| <b>Figure S20.</b> $^1\text{H}$ NMR spectrum of compound <b>7</b> [acetone- $d_6$ / $\text{D}_2\text{O}$ , 9/1, $v/v$ , 600 MHz]                 | <b>S23</b> |
| <b>Figure S21.</b> $^1\text{H}$ - $^1\text{H}$ COSY spectrum of compound <b>7</b> [acetone- $d_6$ / $\text{D}_2\text{O}$ , 9/1, $v/v$ , 600 MHz] | <b>S24</b> |
| <b>Figure S22.</b> $^{13}\text{C}$ NMR spectrum of compound <b>7</b> [acetone- $d_6$ / $\text{D}_2\text{O}$ , 9/1, $v/v$ , 151 MHz]              | <b>S25</b> |
| <b>Figure S23.</b> HSQC spectrum of compound <b>7</b> [acetone- $d_6$ / $\text{D}_2\text{O}$ , 9/1, $v/v$ , 600 MHz]                             | <b>S26</b> |
| <b>Figure S24.</b> HMBC spectrum of compound <b>7</b> [acetone- $d_6$ / $\text{D}_2\text{O}$ , 9/1, $v/v$ , 600 MHz]                             | <b>S27</b> |
| <b>Figure S25.</b> $^1\text{H}$ NMR spectrum of compound <b>8</b> [acetone- $d_6$ / $\text{D}_2\text{O}$ , 9/1, $v/v$ , 600 MHz]                 | <b>S28</b> |
| <b>Figure S26.</b> $^{13}\text{C}$ NMR spectrum of compound <b>6</b> [acetone- $d_6$ / $\text{D}_2\text{O}$ , 9/1, $v/v$ , 151 MHz]              | <b>S29</b> |
| <b>Figure S27.</b> HSQC spectrum of compound <b>8</b> [acetone- $d_6$ / $\text{D}_2\text{O}$ , 9/1, $v/v$ , 600 MHz]                             | <b>S30</b> |
| <b>Figure S28.</b> HMBC spectrum of compound <b>8</b> [acetone- $d_6$ / $\text{D}_2\text{O}$ , 9/1, $v/v$ , 600 MHz]                             | <b>S31</b> |
| <b>Figure S29.</b> $^1\text{H}$ NMR spectrum of compound <b>9</b> [acetone- $d_6$ / $\text{D}_2\text{O}$ , 9/1, $v/v$ , 600 MHz]                 | <b>S32</b> |
| <b>Figure S30.</b> $^{13}\text{C}$ NMR spectrum of compound <b>9</b> [acetone- $d_6$ / $\text{D}_2\text{O}$ , 9/1, $v/v$ , 151 MHz]              | <b>S33</b> |

|                                                                                                                                     |            |
|-------------------------------------------------------------------------------------------------------------------------------------|------------|
| <b>Figure S31.</b> $^1\text{H}$ NMR spectrum of compound <b>10</b> [acetone- $d_6$ /D $_2$ O, 9/1, $v/v$ , 600 MHz]                 | <b>S34</b> |
| <b>Figure S32.</b> $^1\text{H}$ – $^1\text{H}$ COSY spectrum of compound <b>10</b> [acetone- $d_6$ /D $_2$ O, 9/1, $v/v$ , 600 MHz] | <b>S35</b> |
| <b>Figure S33.</b> $^{13}\text{C}$ NMR spectrum of compound <b>10</b> [acetone- $d_6$ /D $_2$ O, 9/1, $v/v$ , 151 MHz]              | <b>S36</b> |
| <b>Figure S34.</b> HSQC spectrum of compound <b>10</b> [acetone- $d_6$ /D $_2$ O, 9/1, $v/v$ , 600 MHz]                             | <b>S37</b> |
| <b>Figure S35.</b> HMBC spectrum of compound <b>10</b> [acetone- $d_6$ /D $_2$ O, 9/1, $v/v$ , 600 MHz]                             | <b>S38</b> |
| <b>Figure S36.</b> $^1\text{H}$ NMR spectrum of compound <b>11</b> CD $_3$ OD, 100 MHz)                                             | <b>S39</b> |
| <b>Figure S37.</b> $^{13}\text{C}$ NMR spectrum of compound <b>11</b> (CD $_3$ OD, 100 MHz)                                         | <b>S40</b> |

---

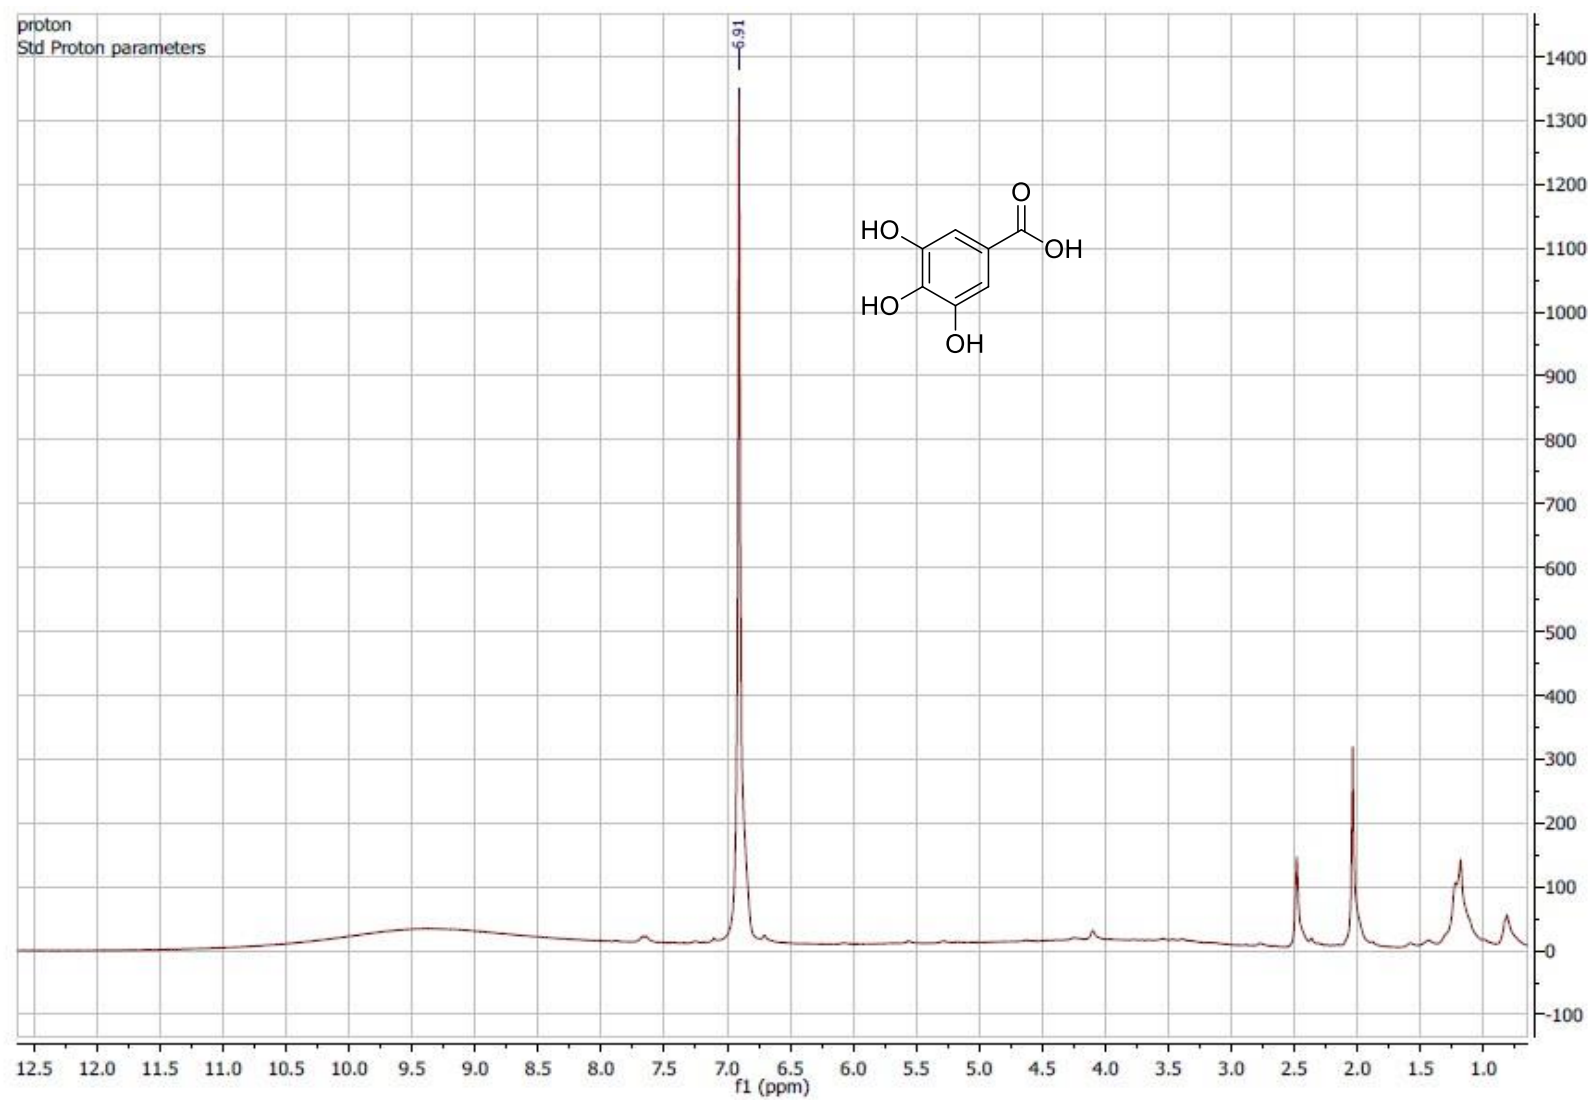

**Figure S1.**  $^1\text{H}$  NMR spectrum of compound **1** ( $\text{DMSO}-d_6$ , 400 MHz)

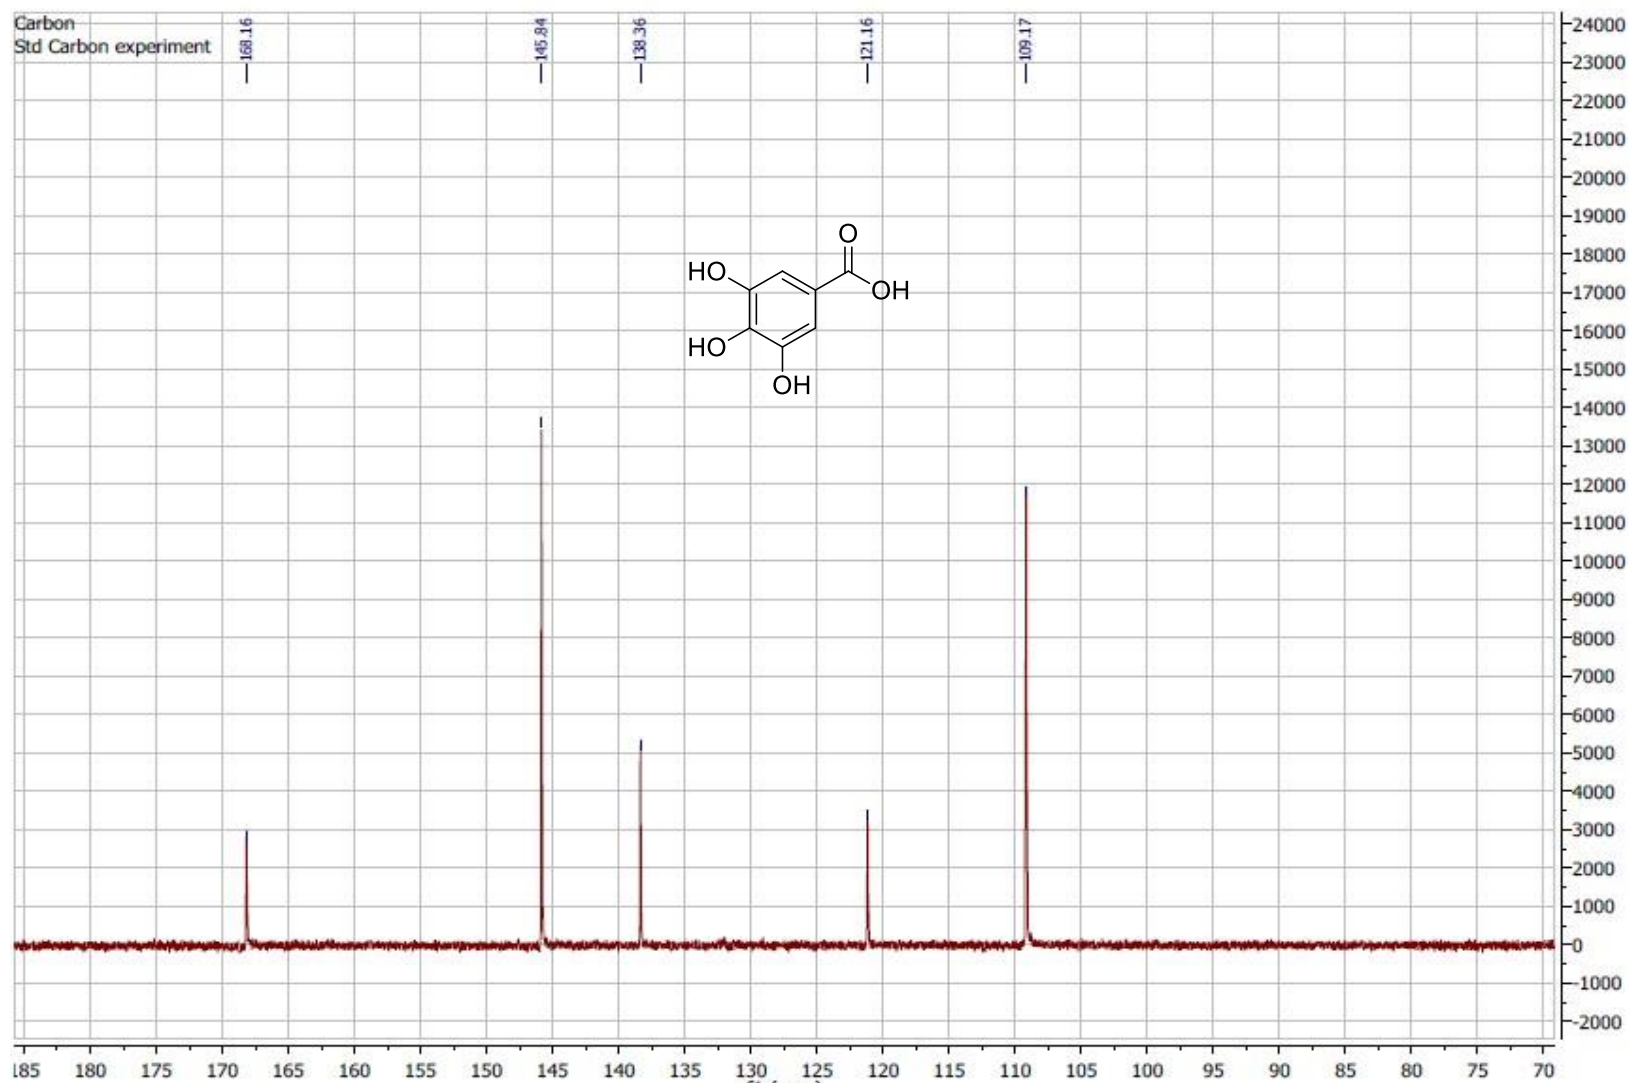

**Figure S2.**  $^{13}\text{C}$  NMR spectrum of compound 1 ( $\text{DMSO-}d_6$ , 100 MHz)

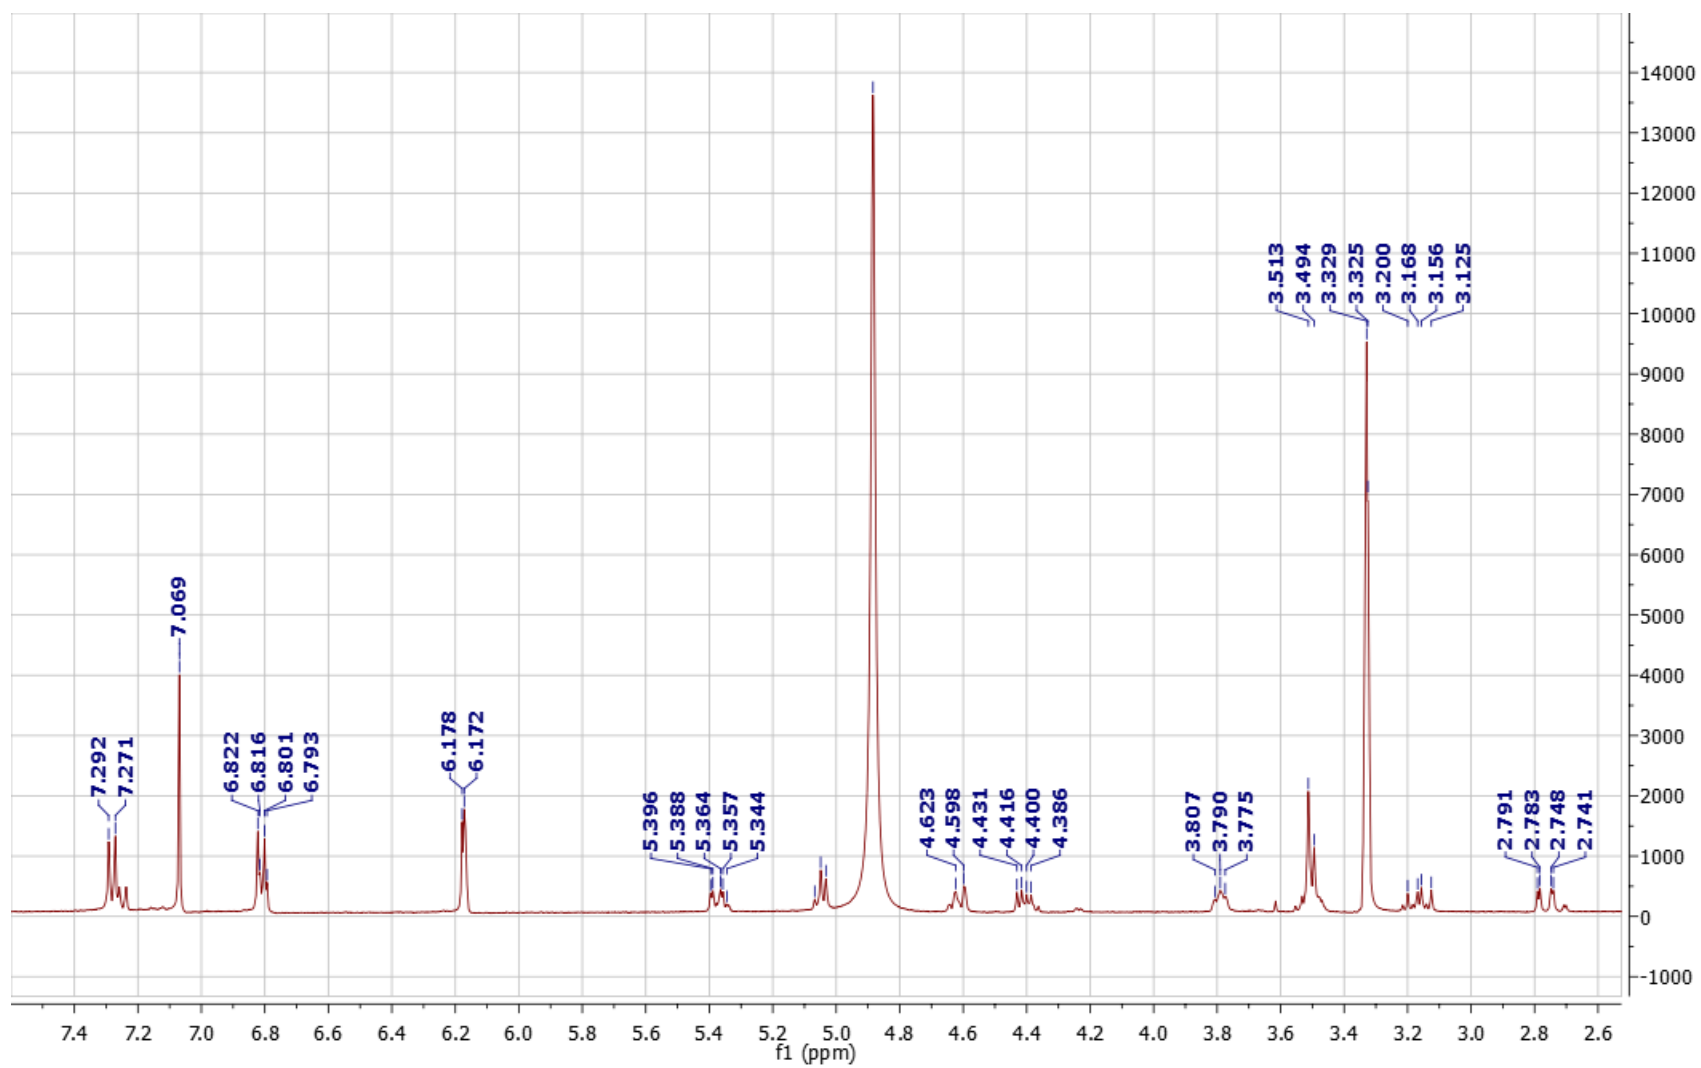

Figure S3. <sup>1</sup>H NMR spectrum of compound 2 (CD<sub>3</sub>OD, 400MHz)

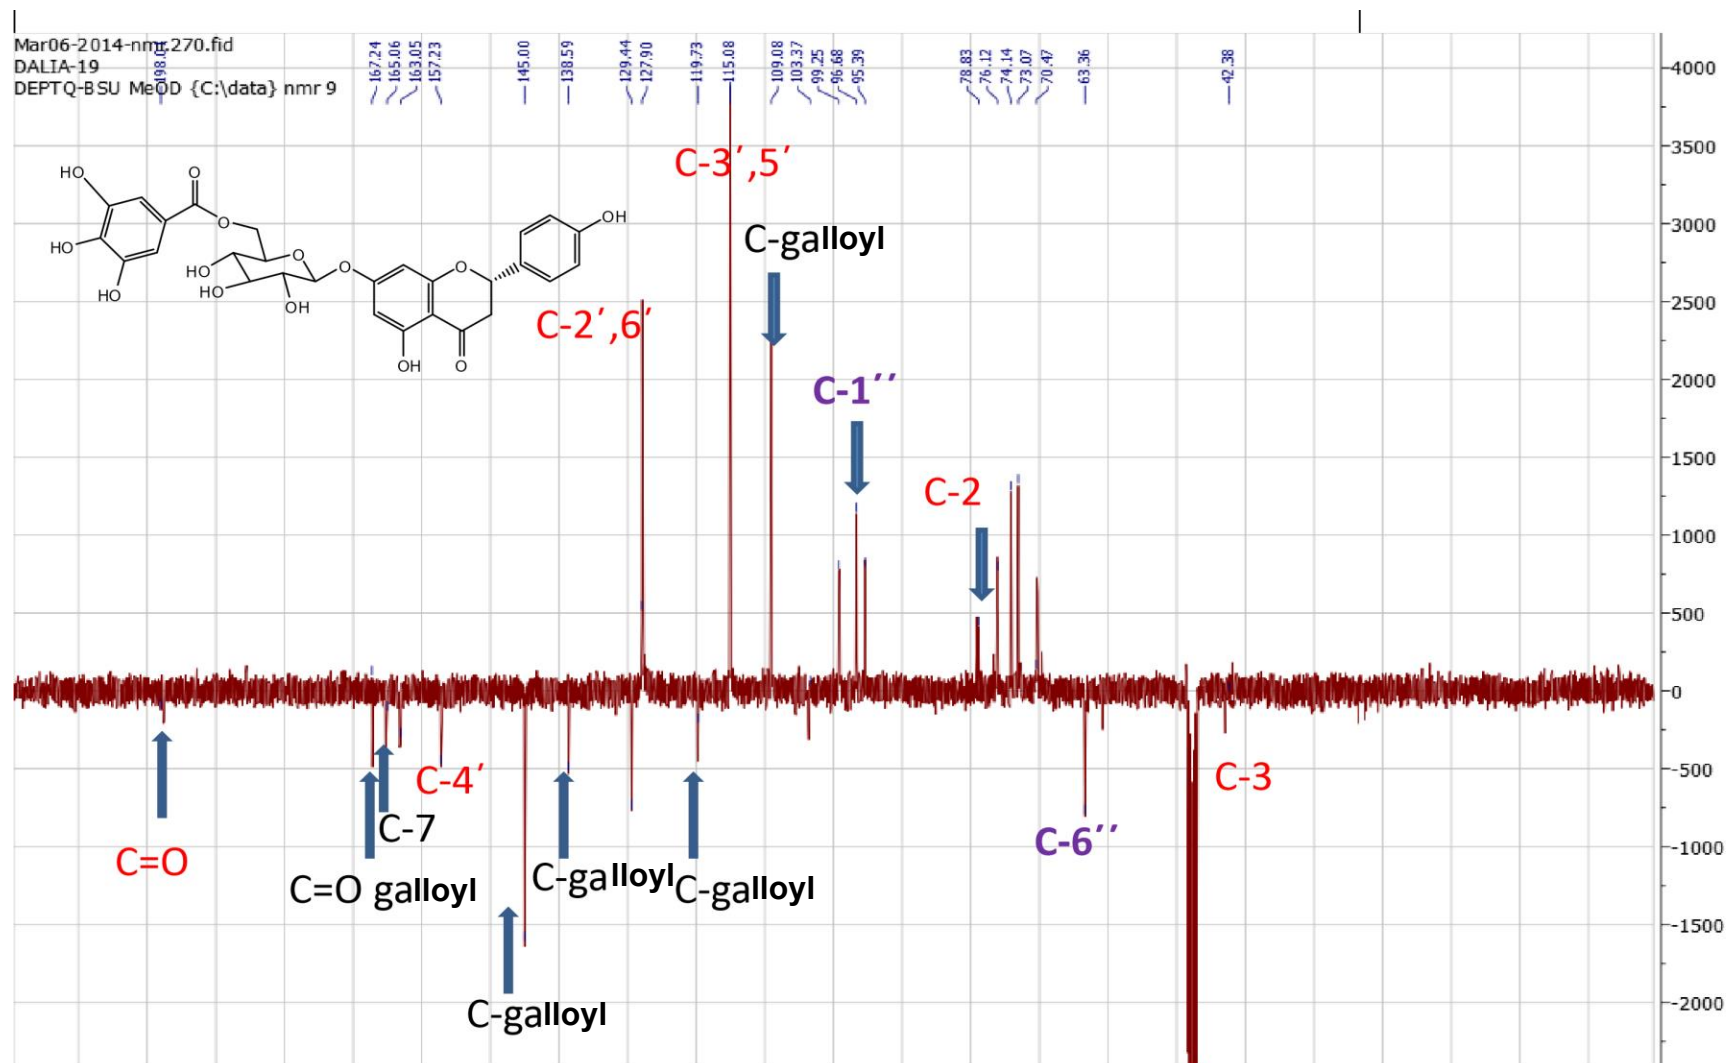

Figure S4. DPTQ NMR spectrum of compound 2 (CD<sub>3</sub>OD, 100 MHz)

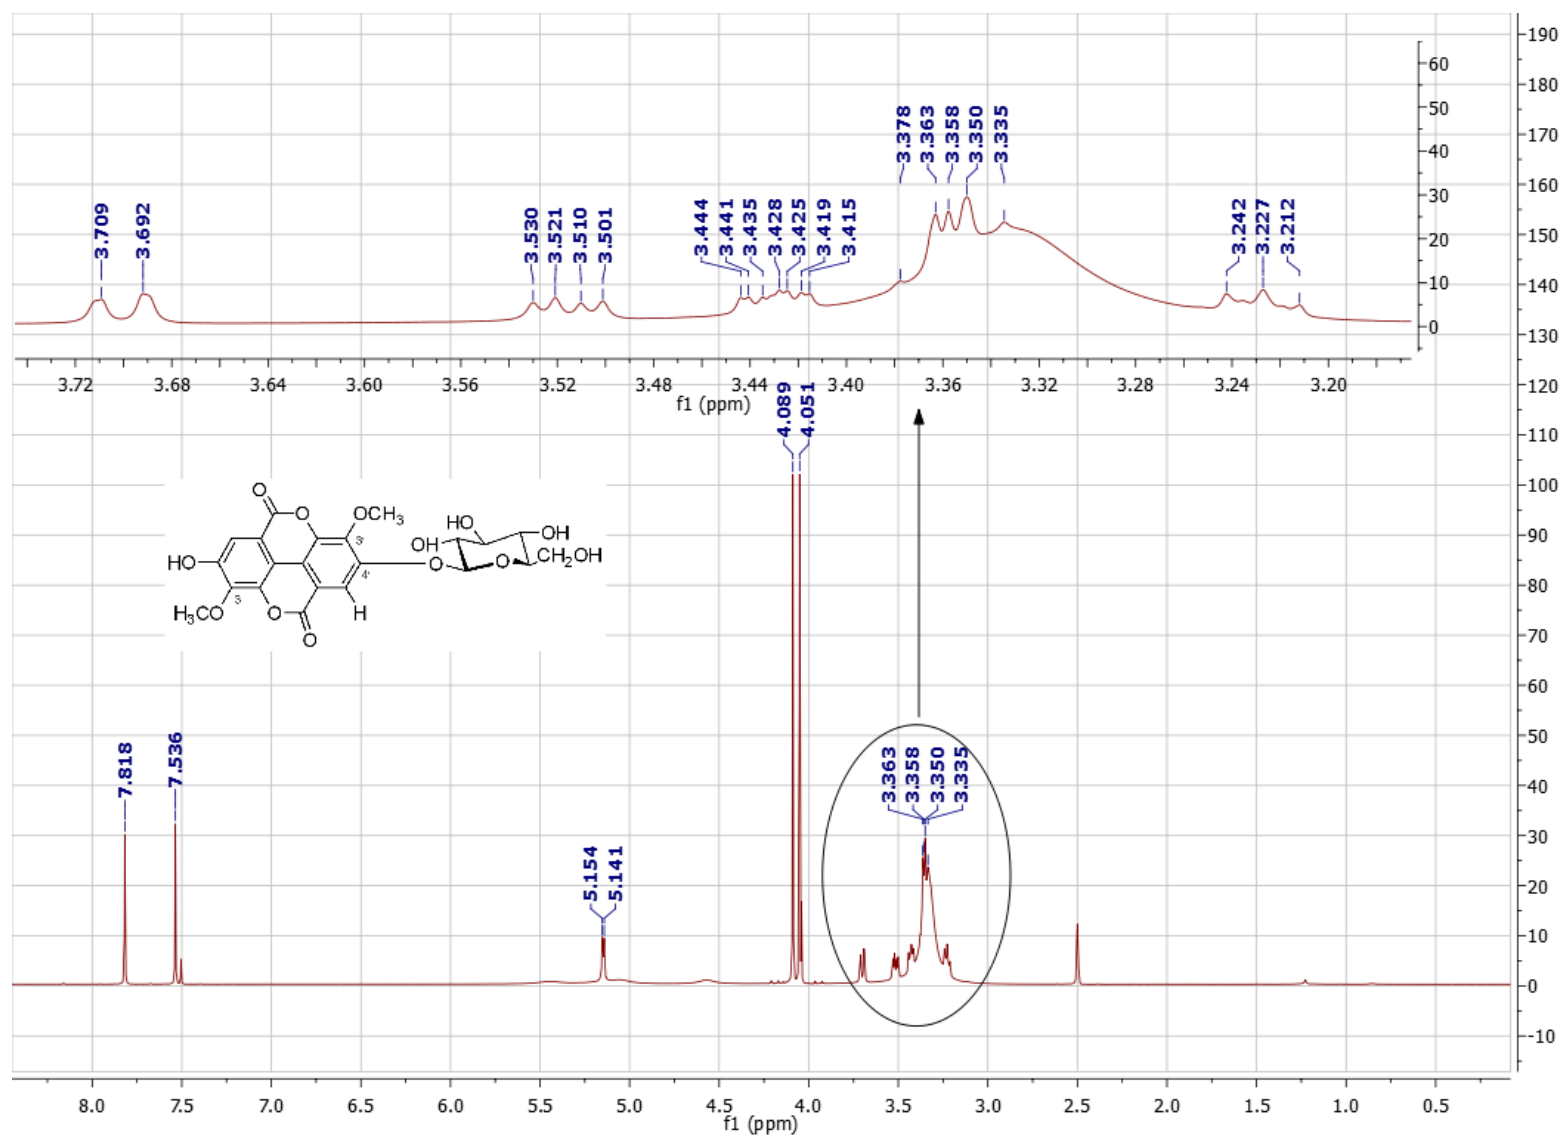

**Figure S5.**  $^1\text{H}$  NMR spectrum of compound **3** [acetone- $d_6$ /D $_2$ O, 9/1, v/v, 600 MHz]



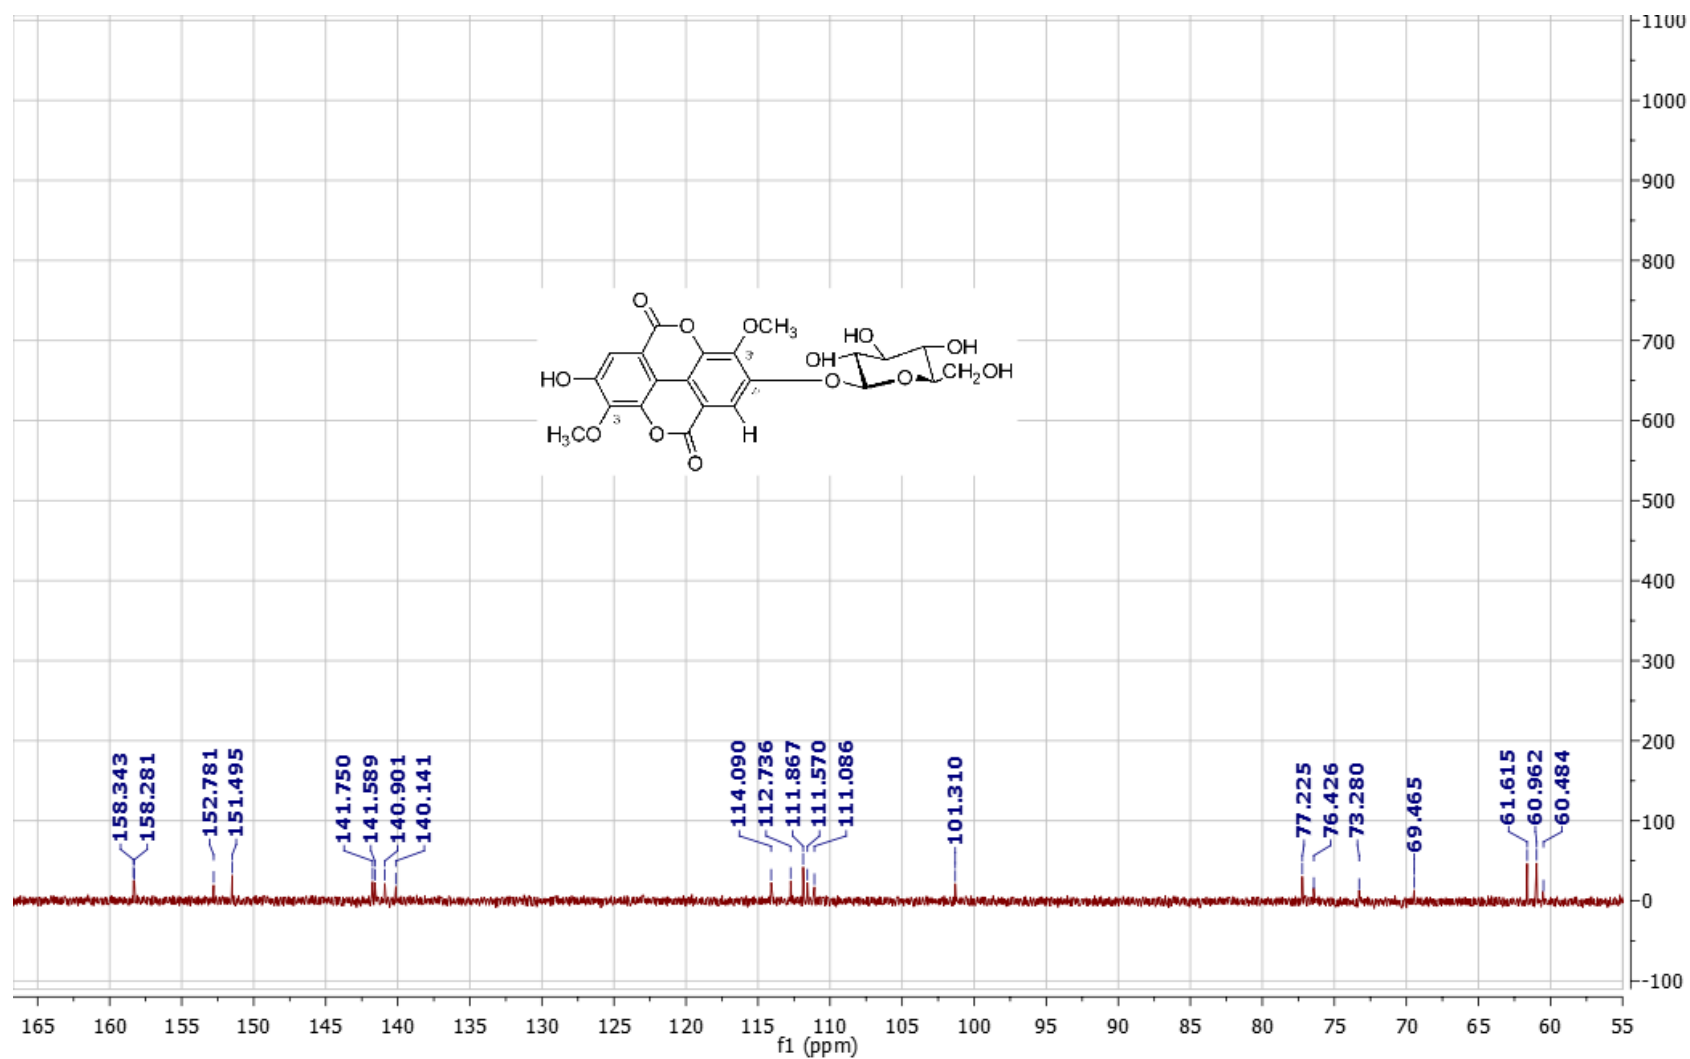

**Figure S6.** <sup>13</sup>C NMR spectrum of compound **3** [acetone-*d*<sub>6</sub>/D<sub>2</sub>O, 9/1, v/v, 151 MHz]

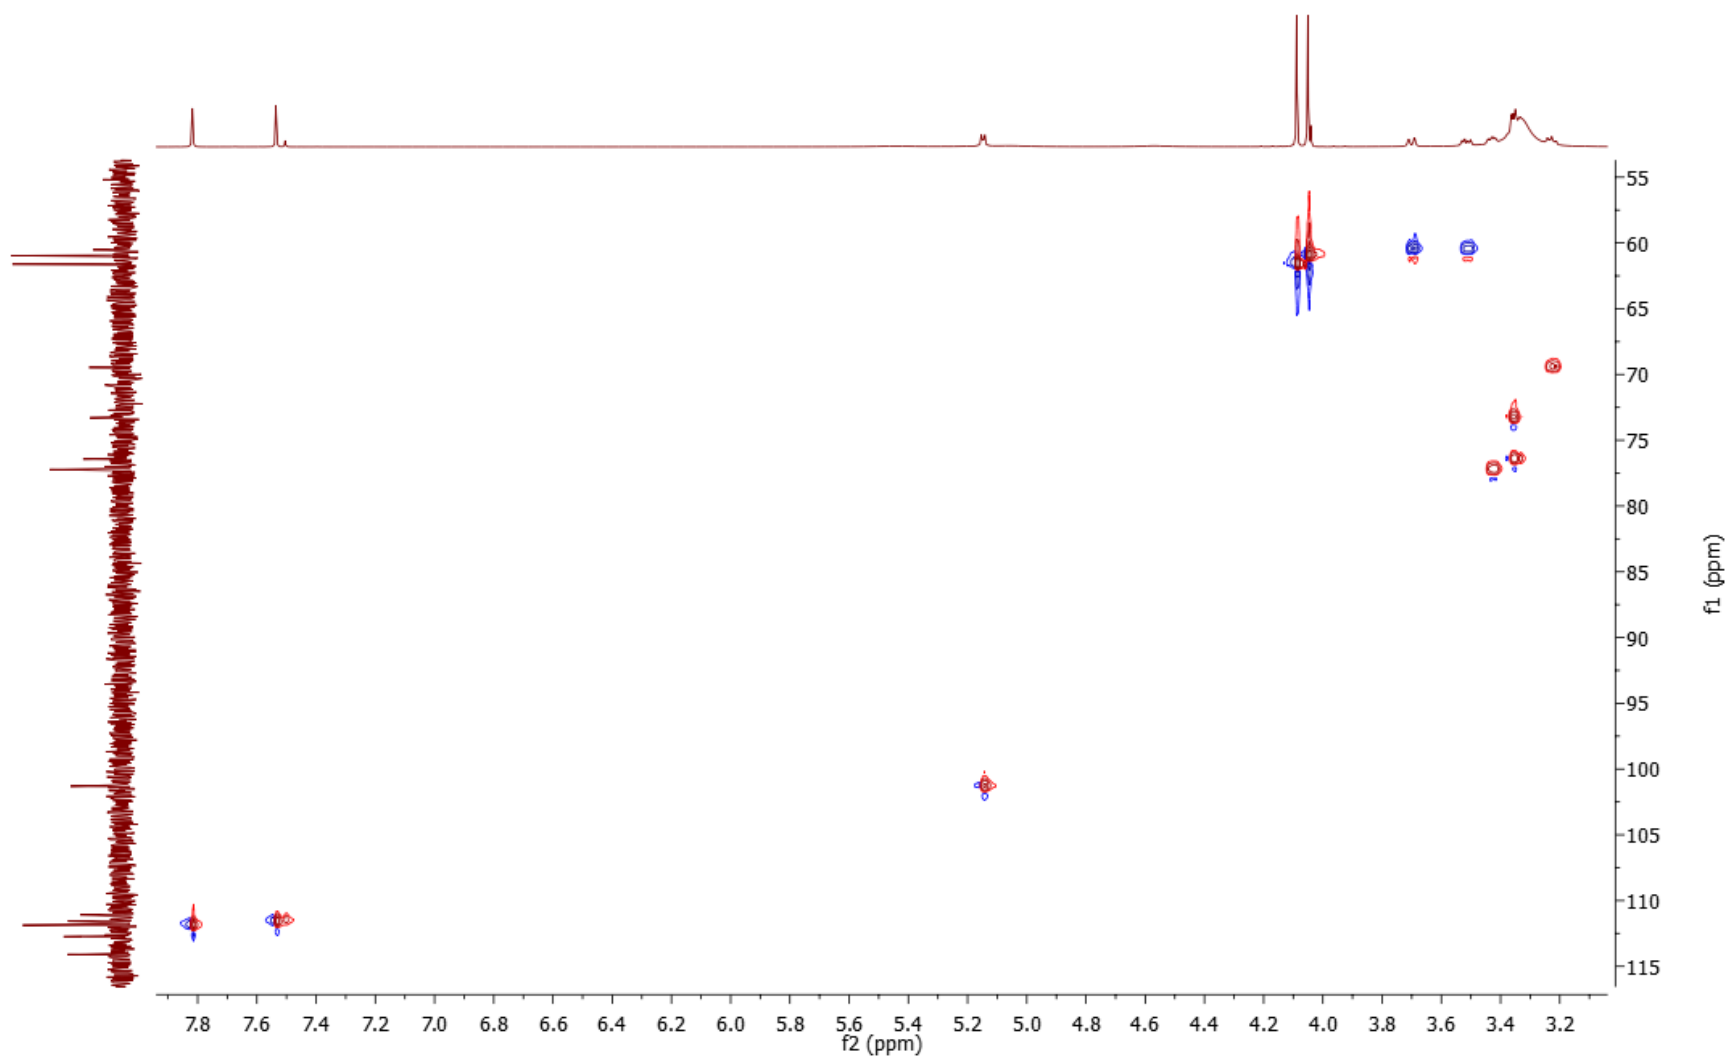

**Figure S7.** HSQC spectrum of compound **3** [acetone- $d_6$ /D $_2$ O, 9/1, v/v, 600 MHz]

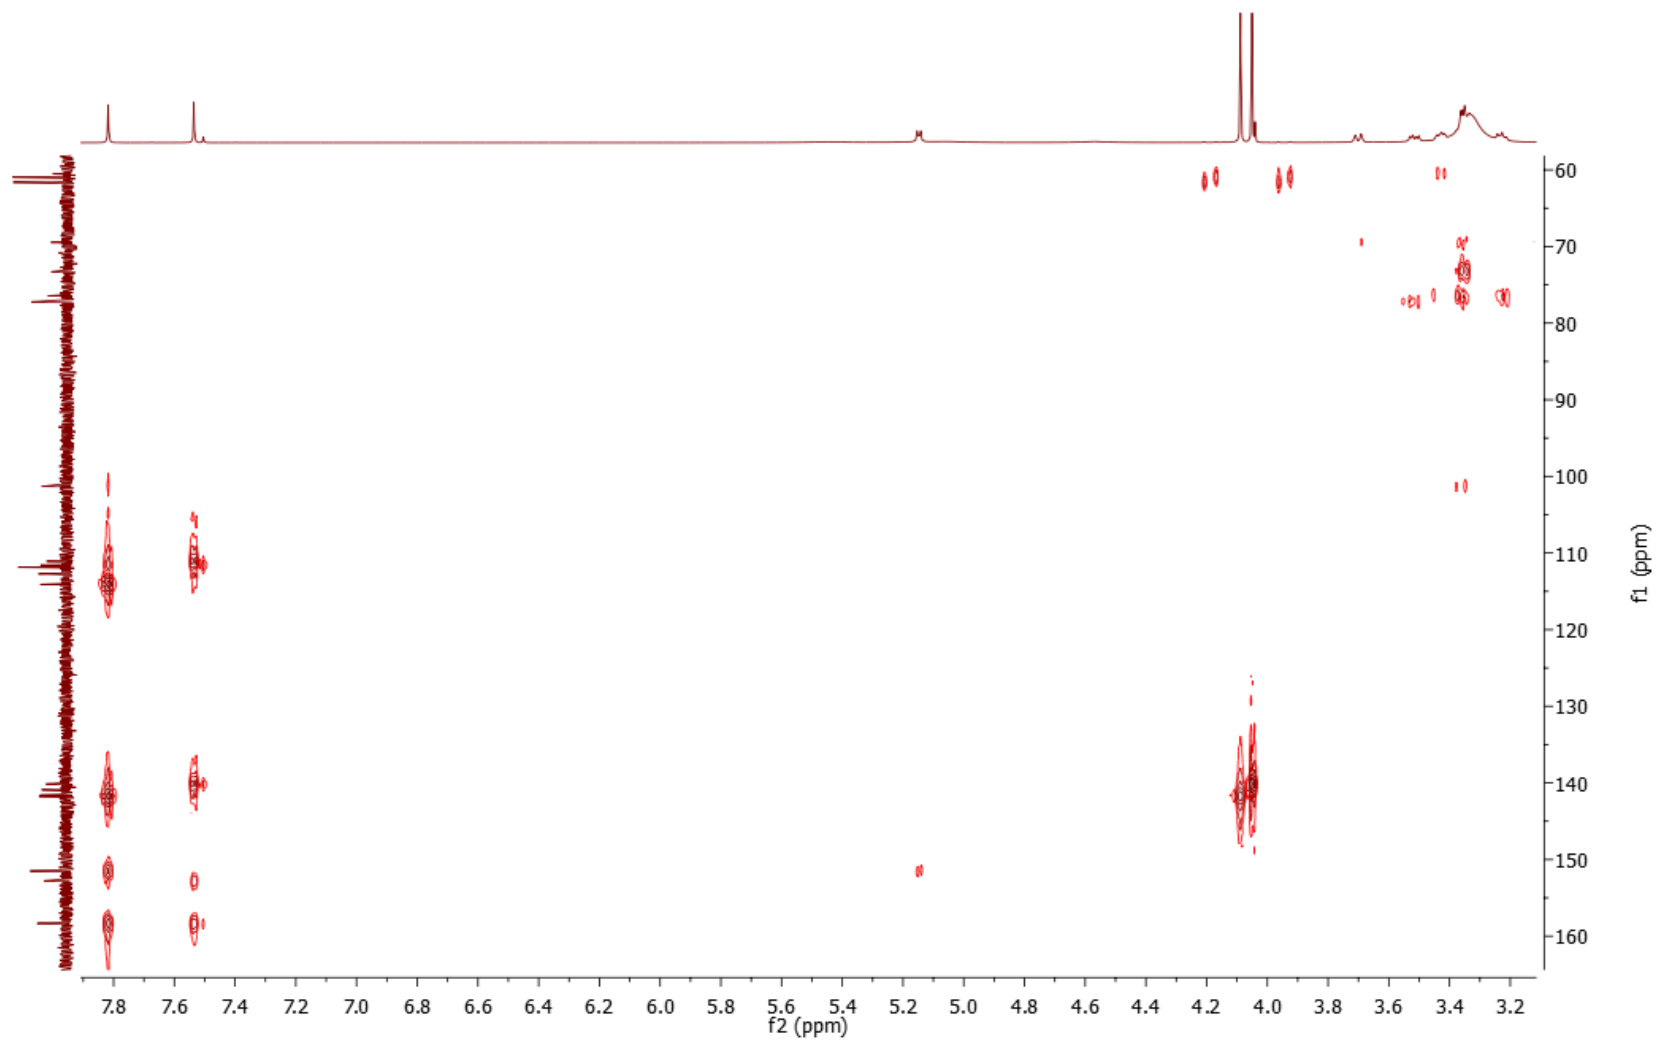

**Figure S8.** HMBC spectrum of compound **3** [acetone- $d_6$ /D $_2$ O, 9/1, v/v, 600 MHz]

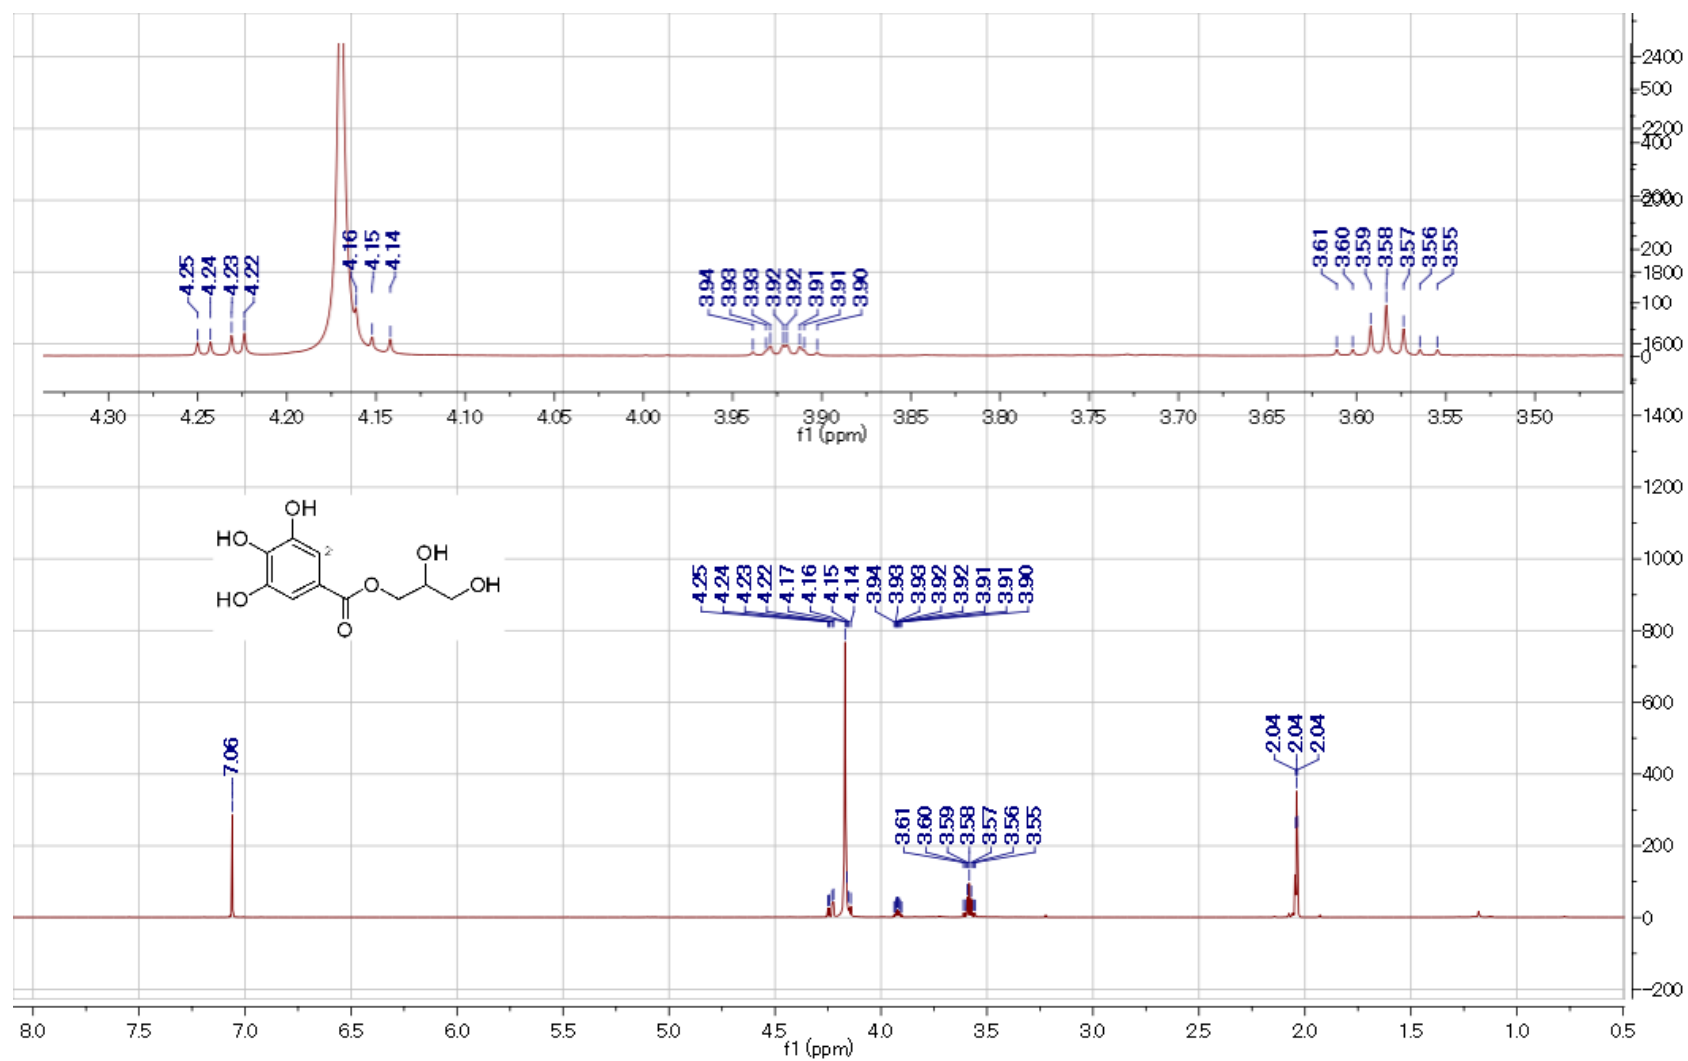

**Figure S9.**  $^1\text{H}$  NMR spectrum of compound **4** [acetone- $d_6$ /D $_2$ O, 9/1, v/v, 600 MHz]

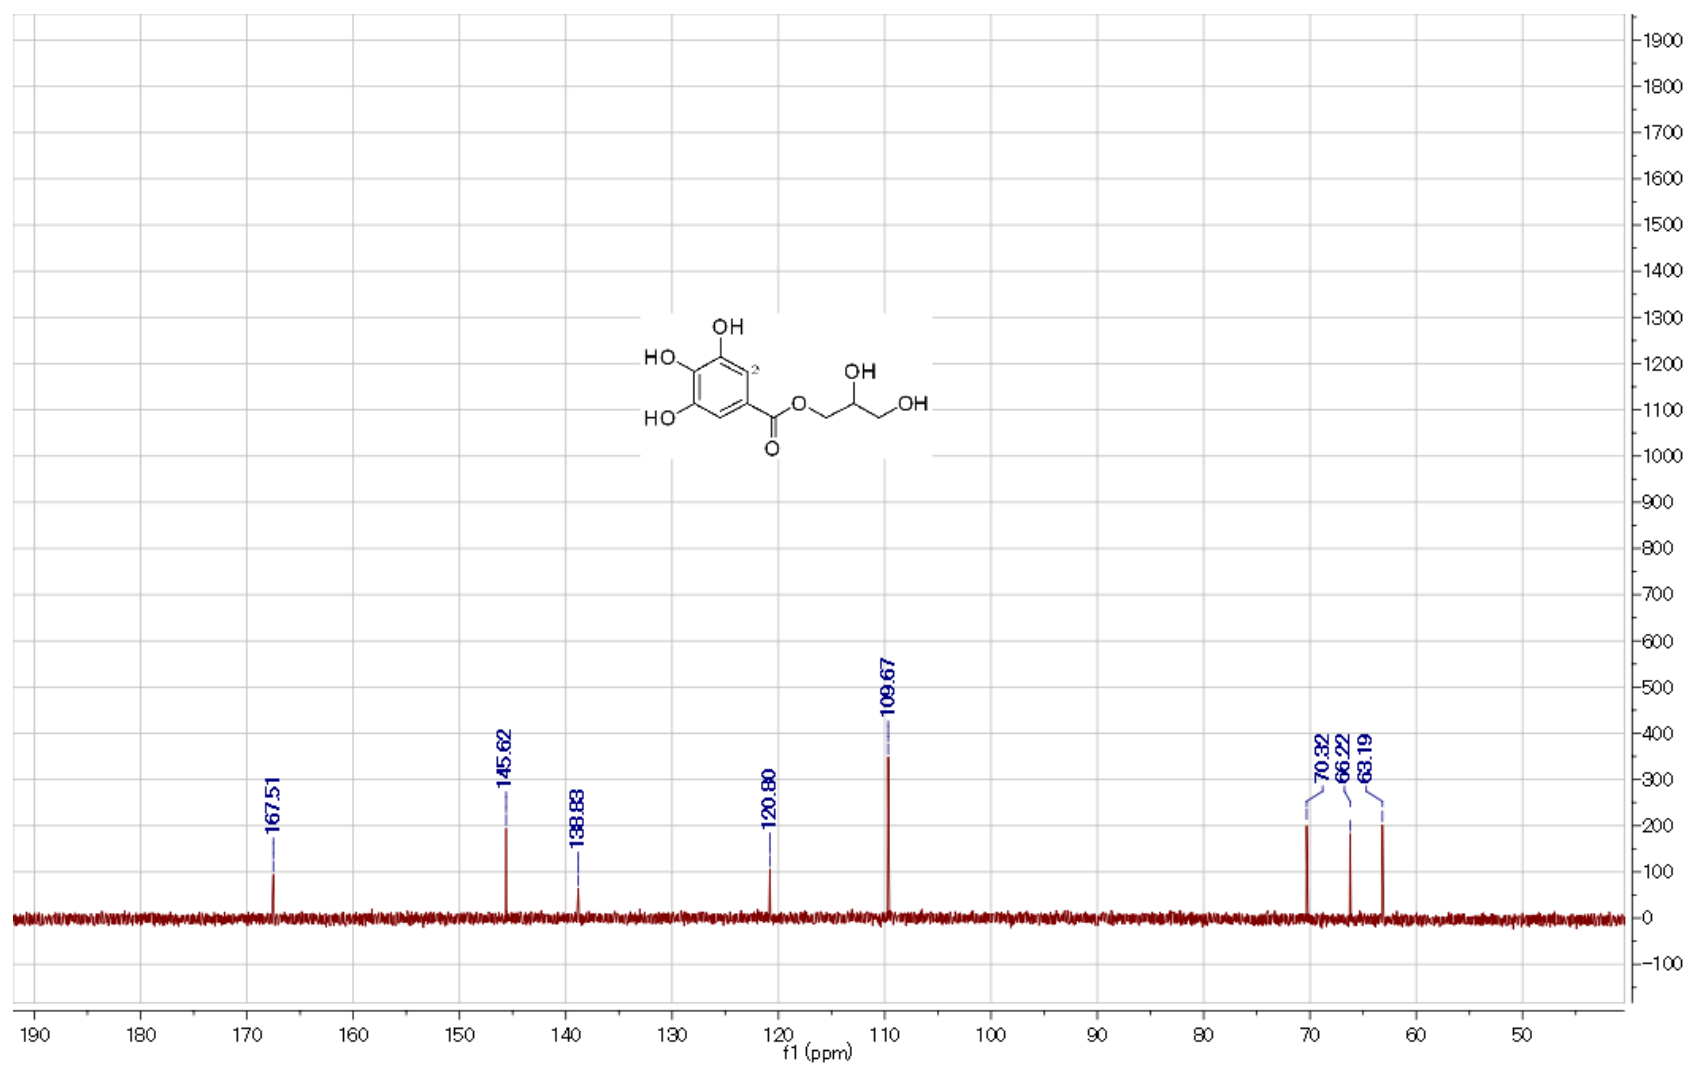

**Figure S10.**  $^{13}\text{C}$  NMR spectrum of compound **4** [acetone- $d_6$ /D $_2$ O, 9/1, v/v, 151 MHz]

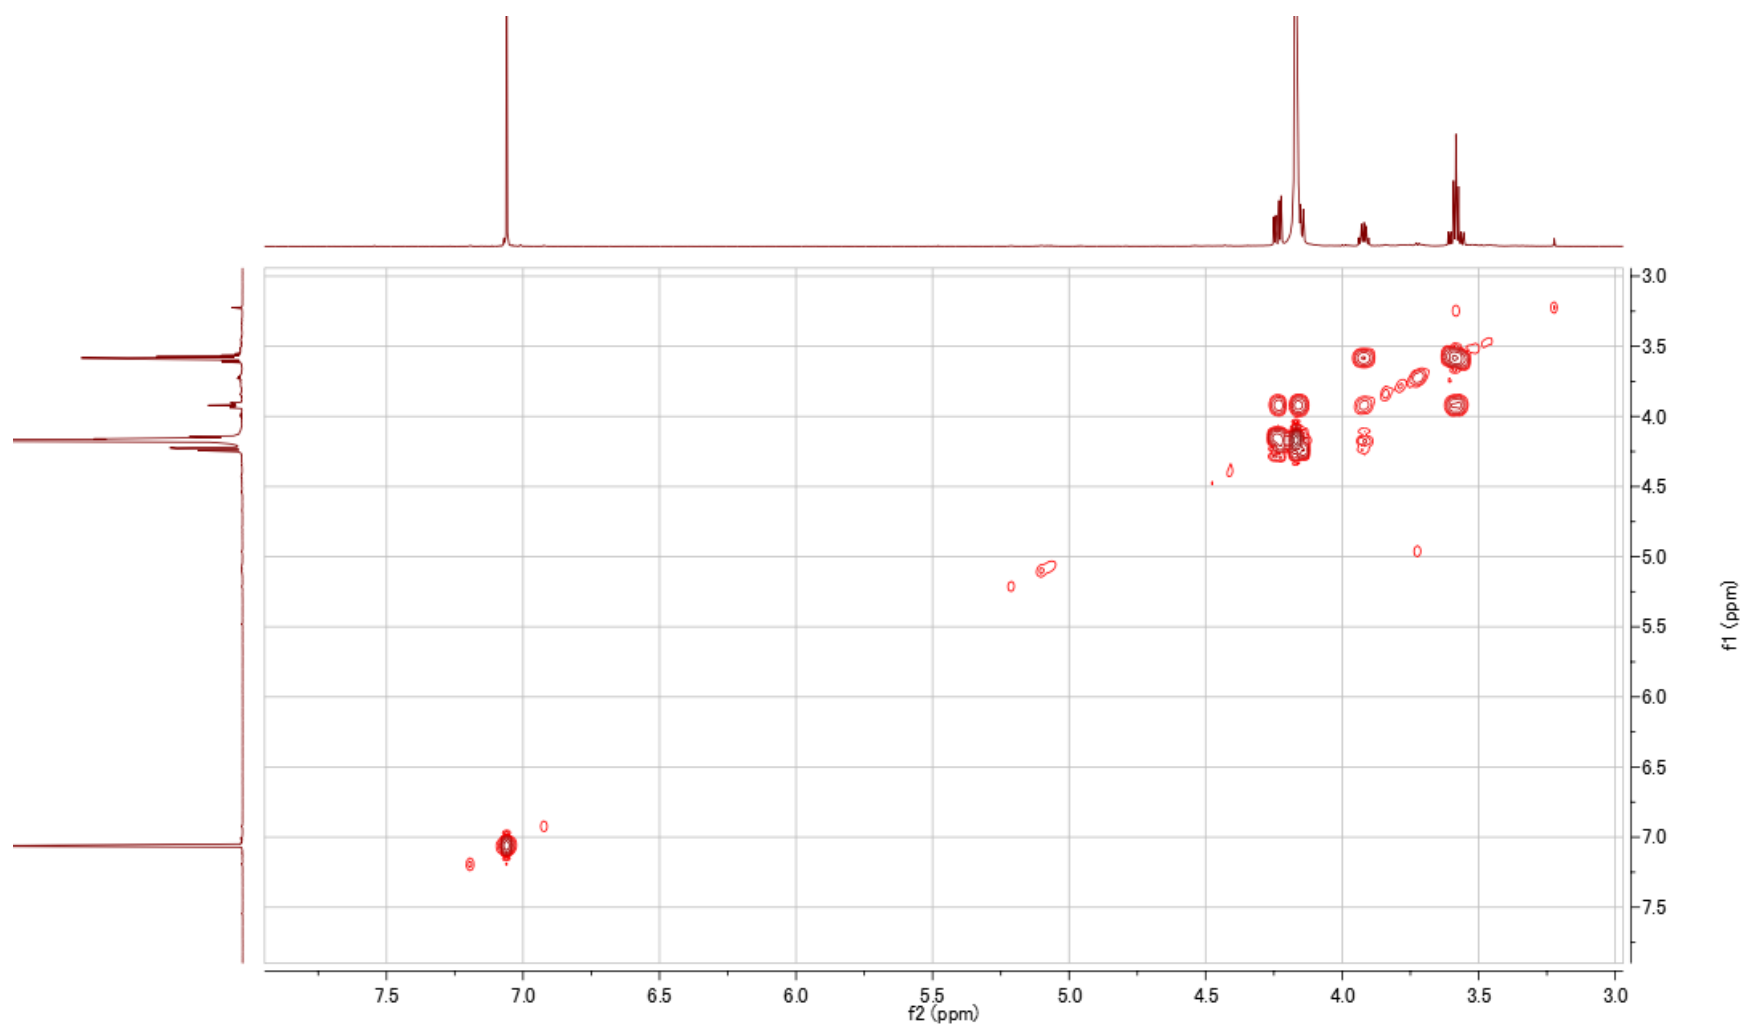

**Figure S11.**  $^1\text{H}$ - $^1\text{H}$  COSY spectrum of compound **4** [acetone- $d_6$ /D $_2$ O, 9/1, v/v, 600 MHz]

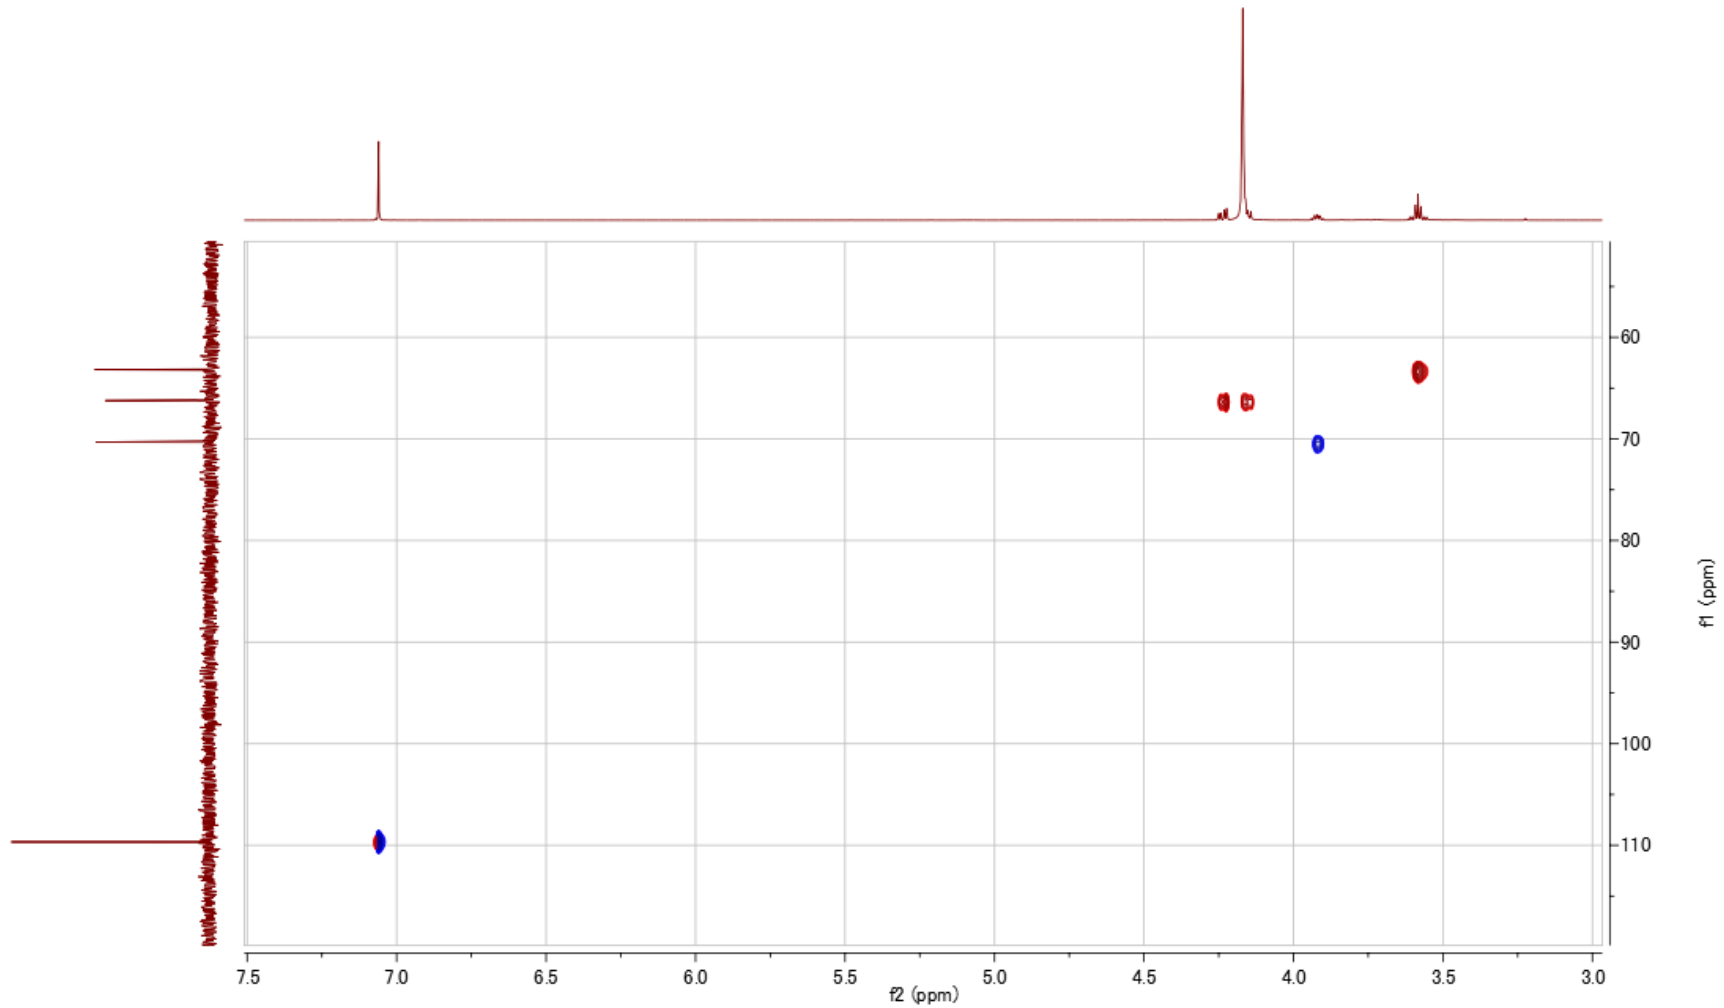

**Figure S12.** HSQC spectrum of compound **4** [acetone- $d_6$ /D $_2$ O, 9/1,  $v/v$ , 600 MHz]

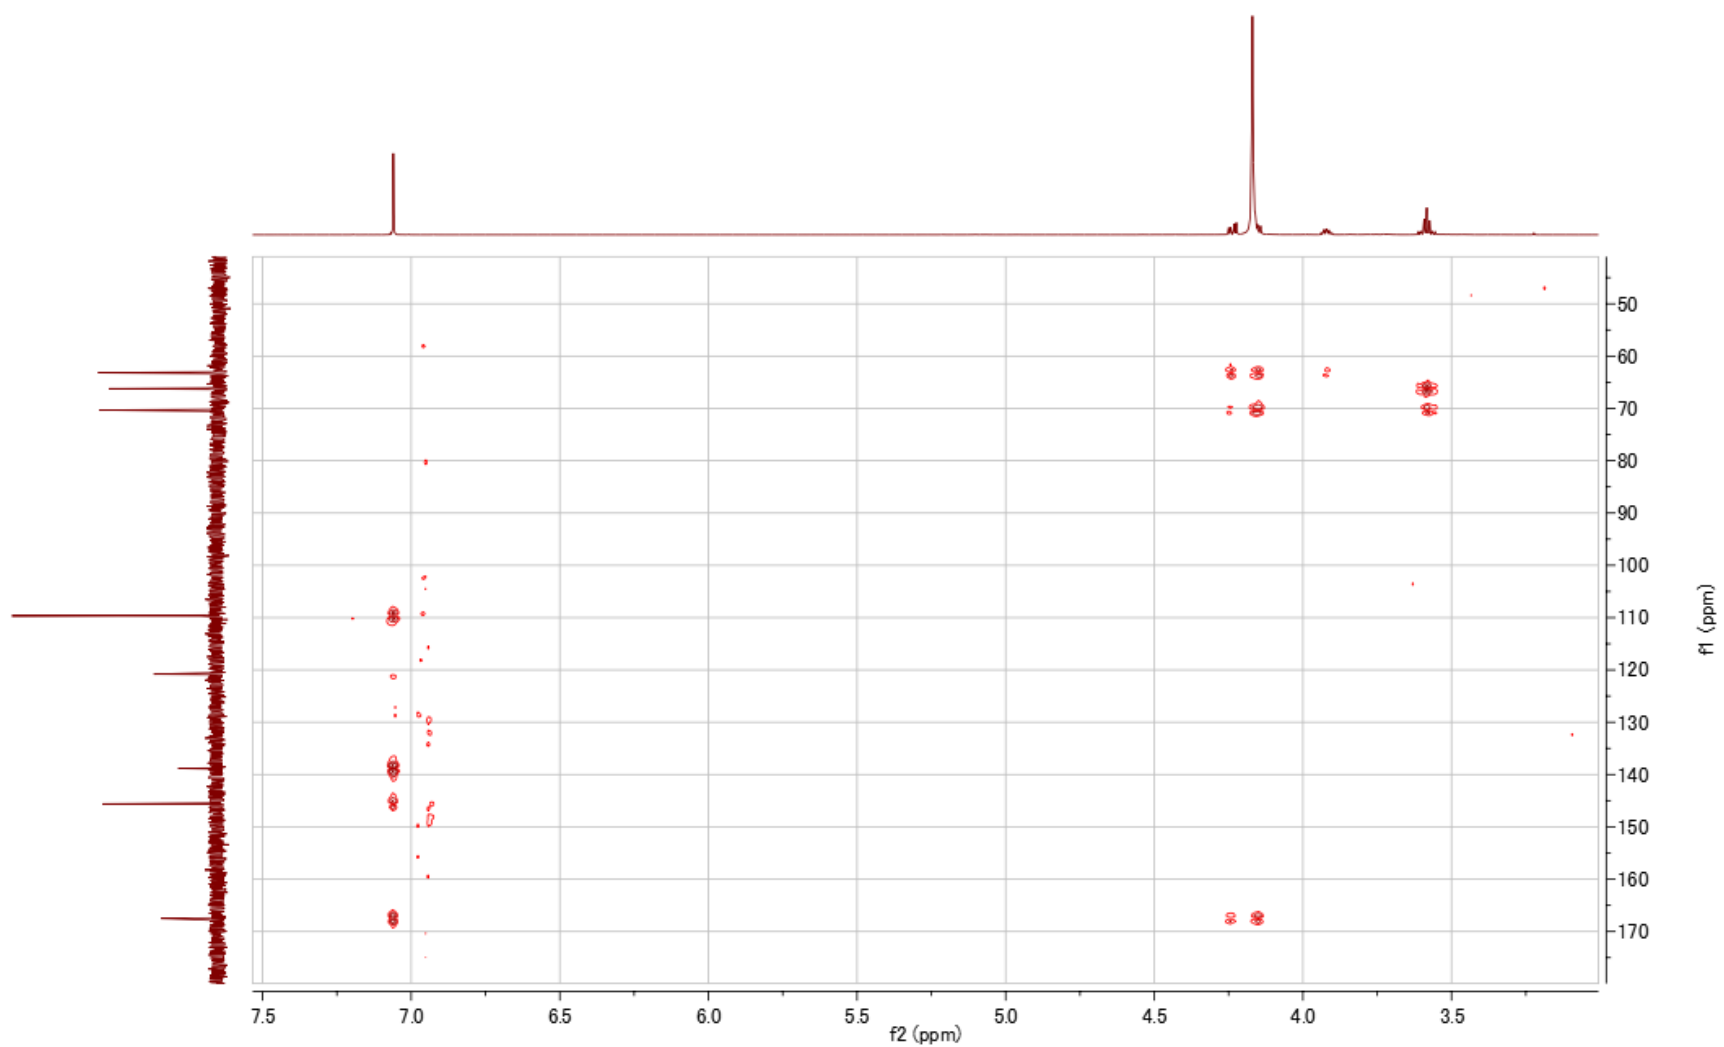

**Figure S13.** HMBC spectrum of compound **4** [acetone- $d_6$ /D $_2$ O, 9/1, v/v, 600 MHz]



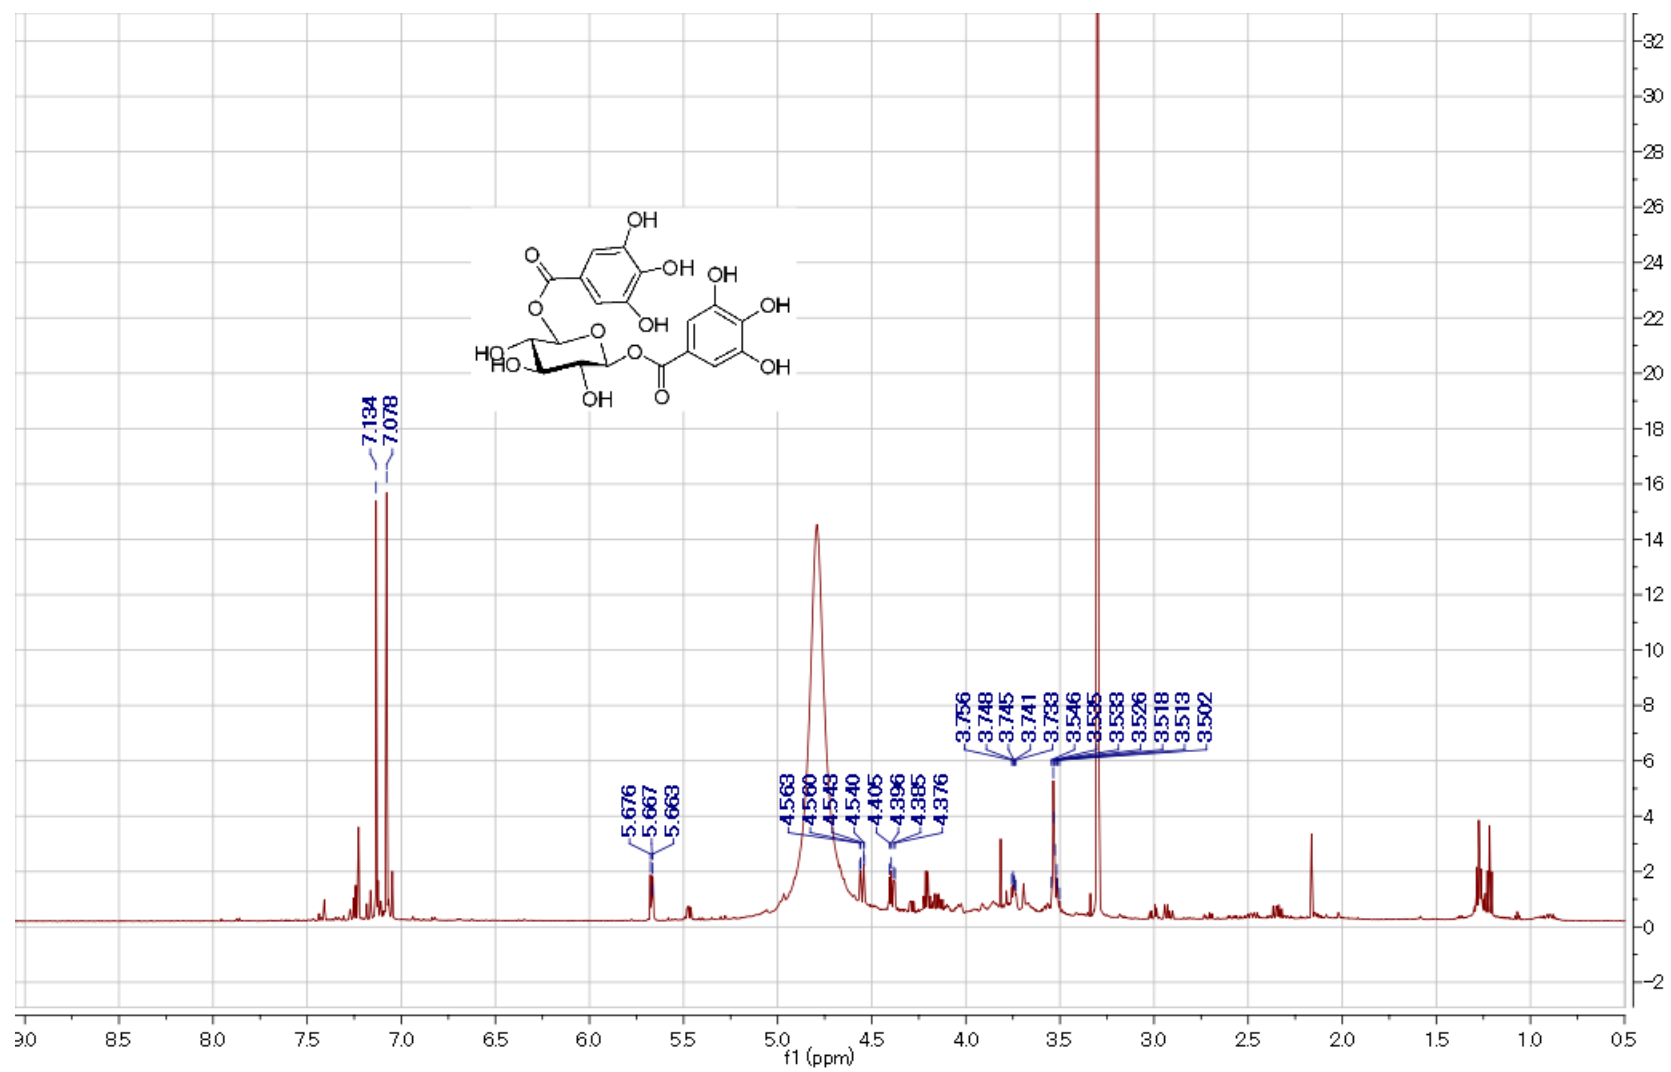

**Figure S14.**  $^1\text{H}$  NMR spectrum of compound **5** [acetone- $d_6$ /D $_2$ O, 9/1, v/v, 600 MHz]

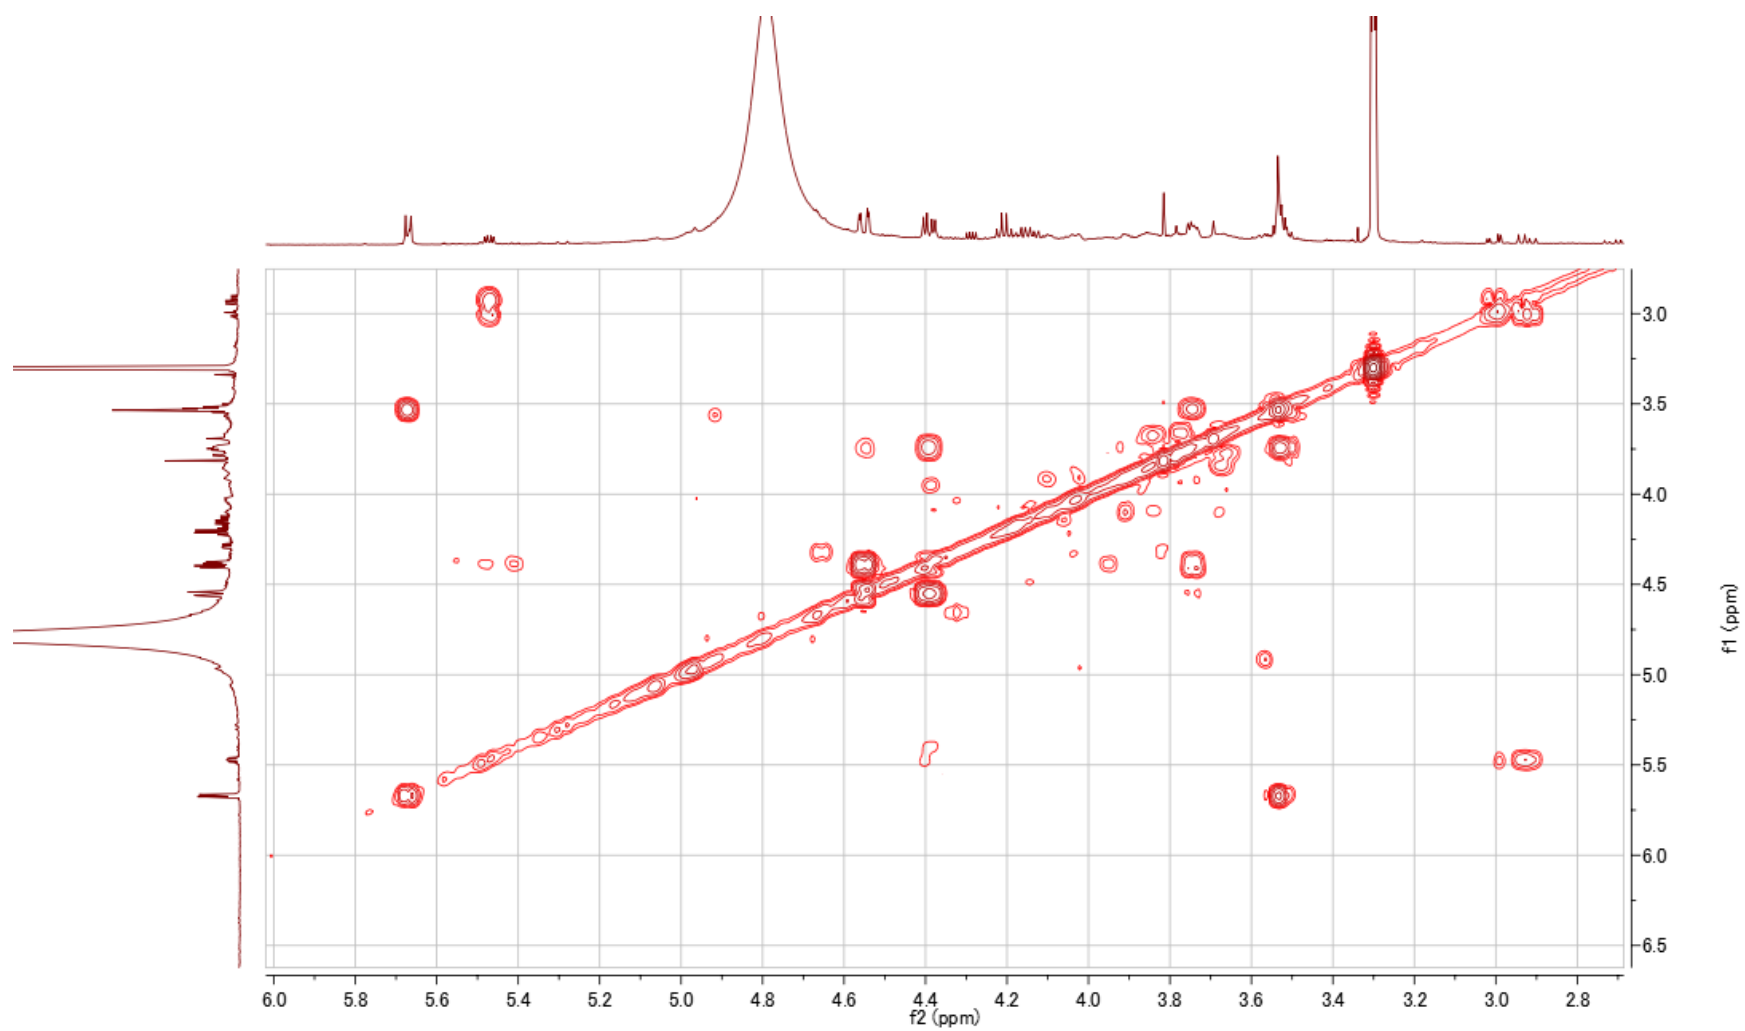

**Figure S15.**  $^1\text{H}$ – $^1\text{H}$  COSY spectrum of compound **5** [acetone- $d_6$ /D $_2$ O, 9/1, v/v, 600 MHz]

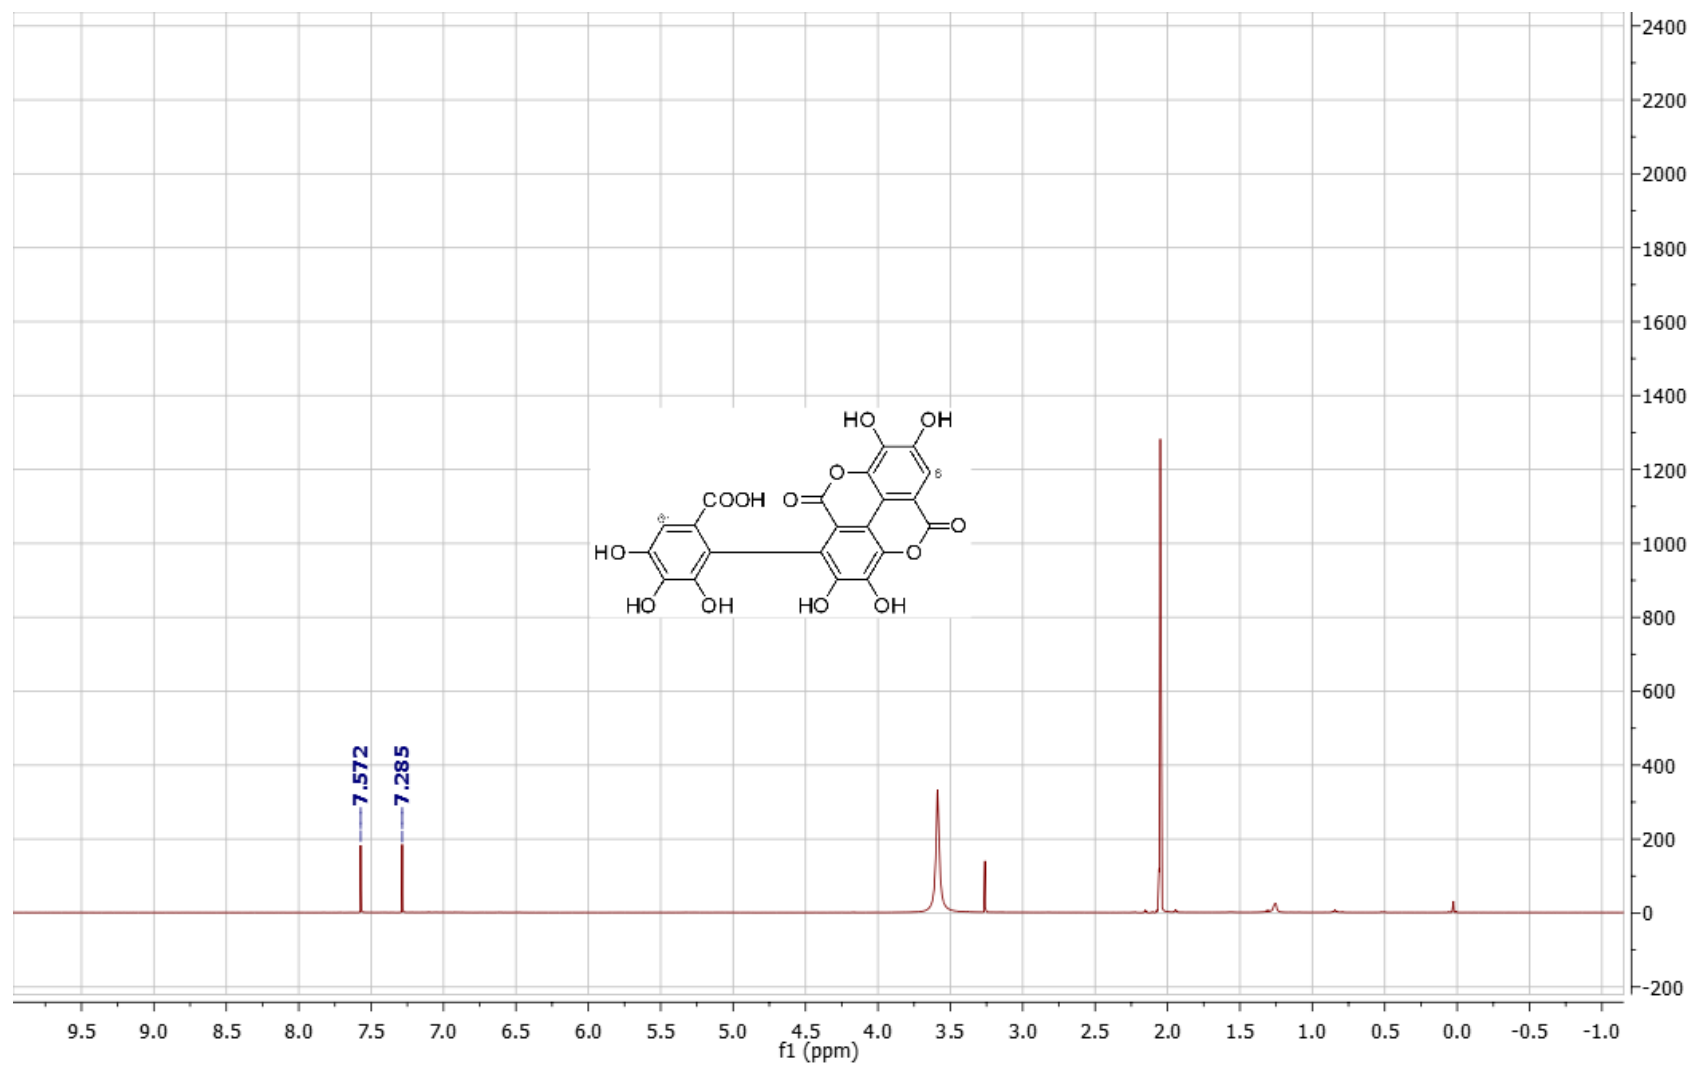

**Figure S16.**  $^1\text{H}$  NMR spectrum of compound **6** [acetone- $d_6$ /D $_2$ O, 9/1, v/v, 600 MHz]

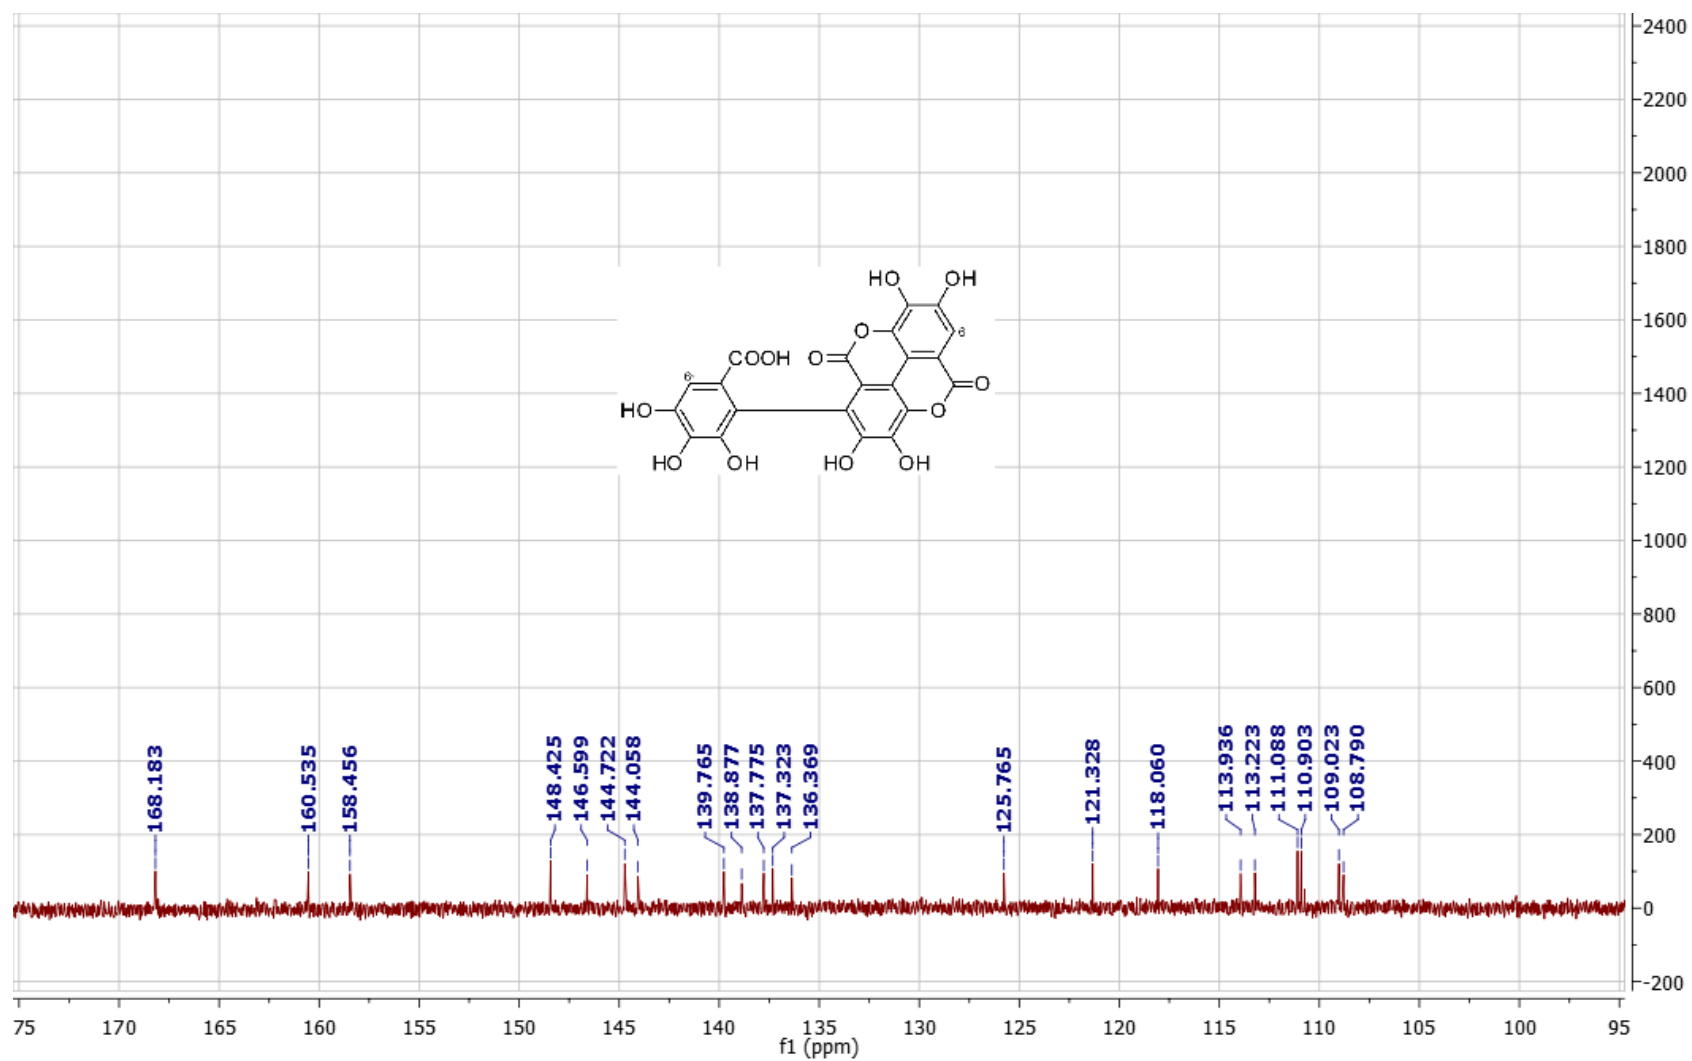

**Figure S17.**  $^{13}\text{C}$  NMR spectrum of compound **6** [acetone- $d_6$ /D $_2$ O, 9/1, v/v, 151 MHz]

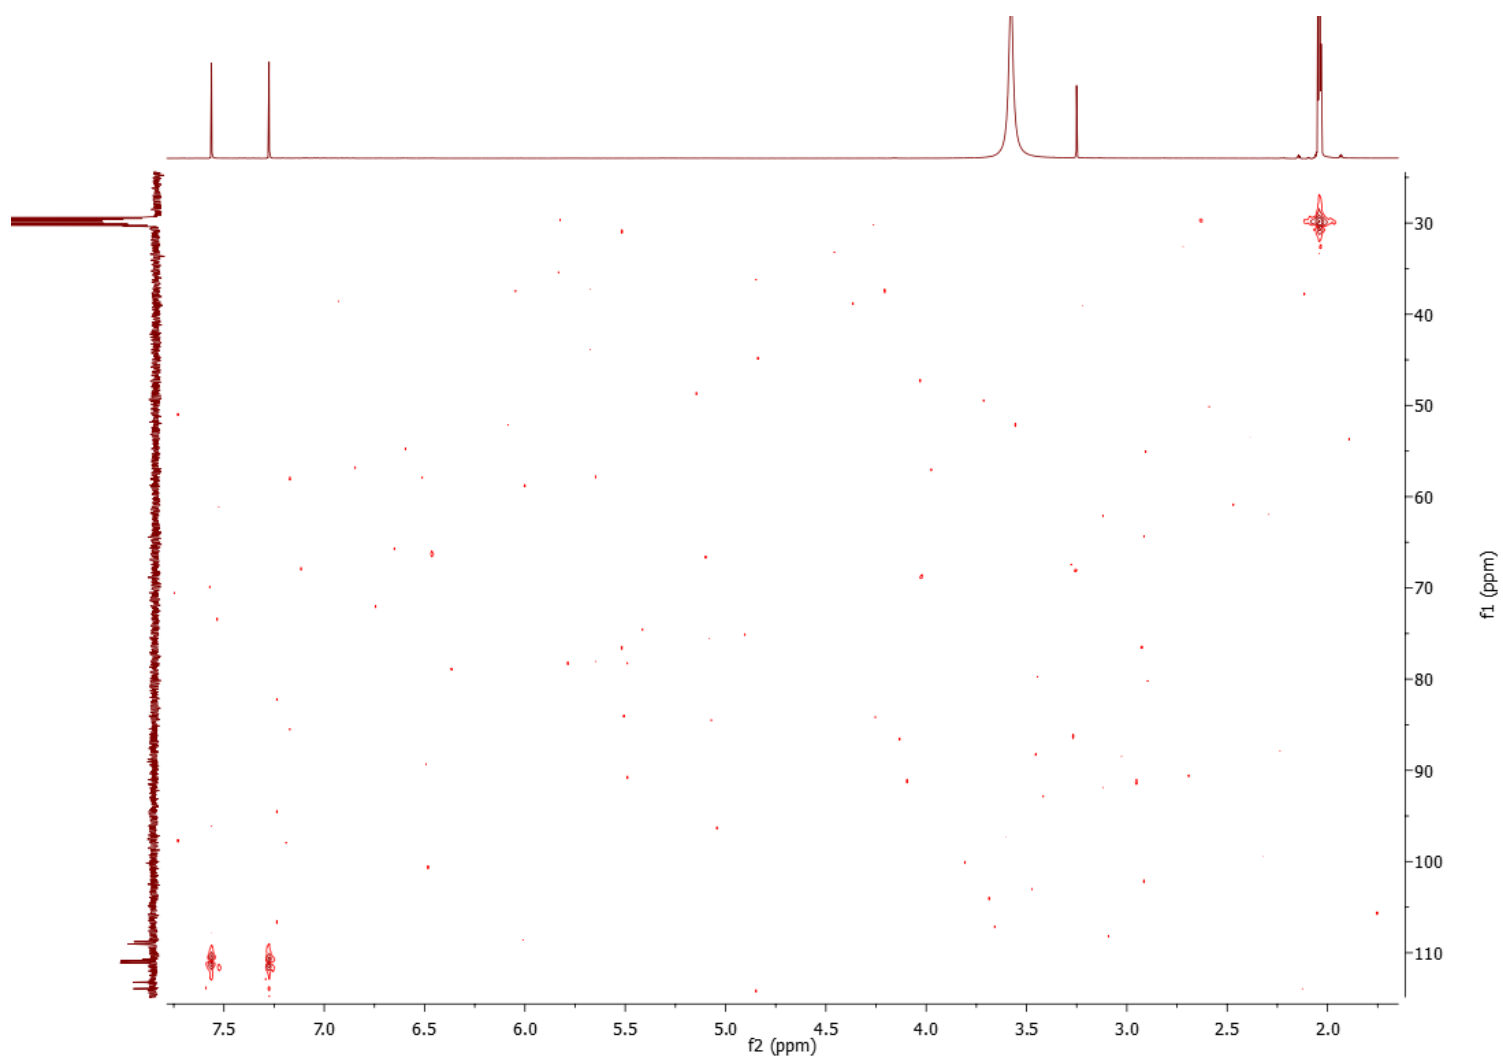

**Figure S18.** HSQC spectrum of compound **6** [acetone- $d_6$ /D $_2$ O, 9/1, v/v, 600 MHz]

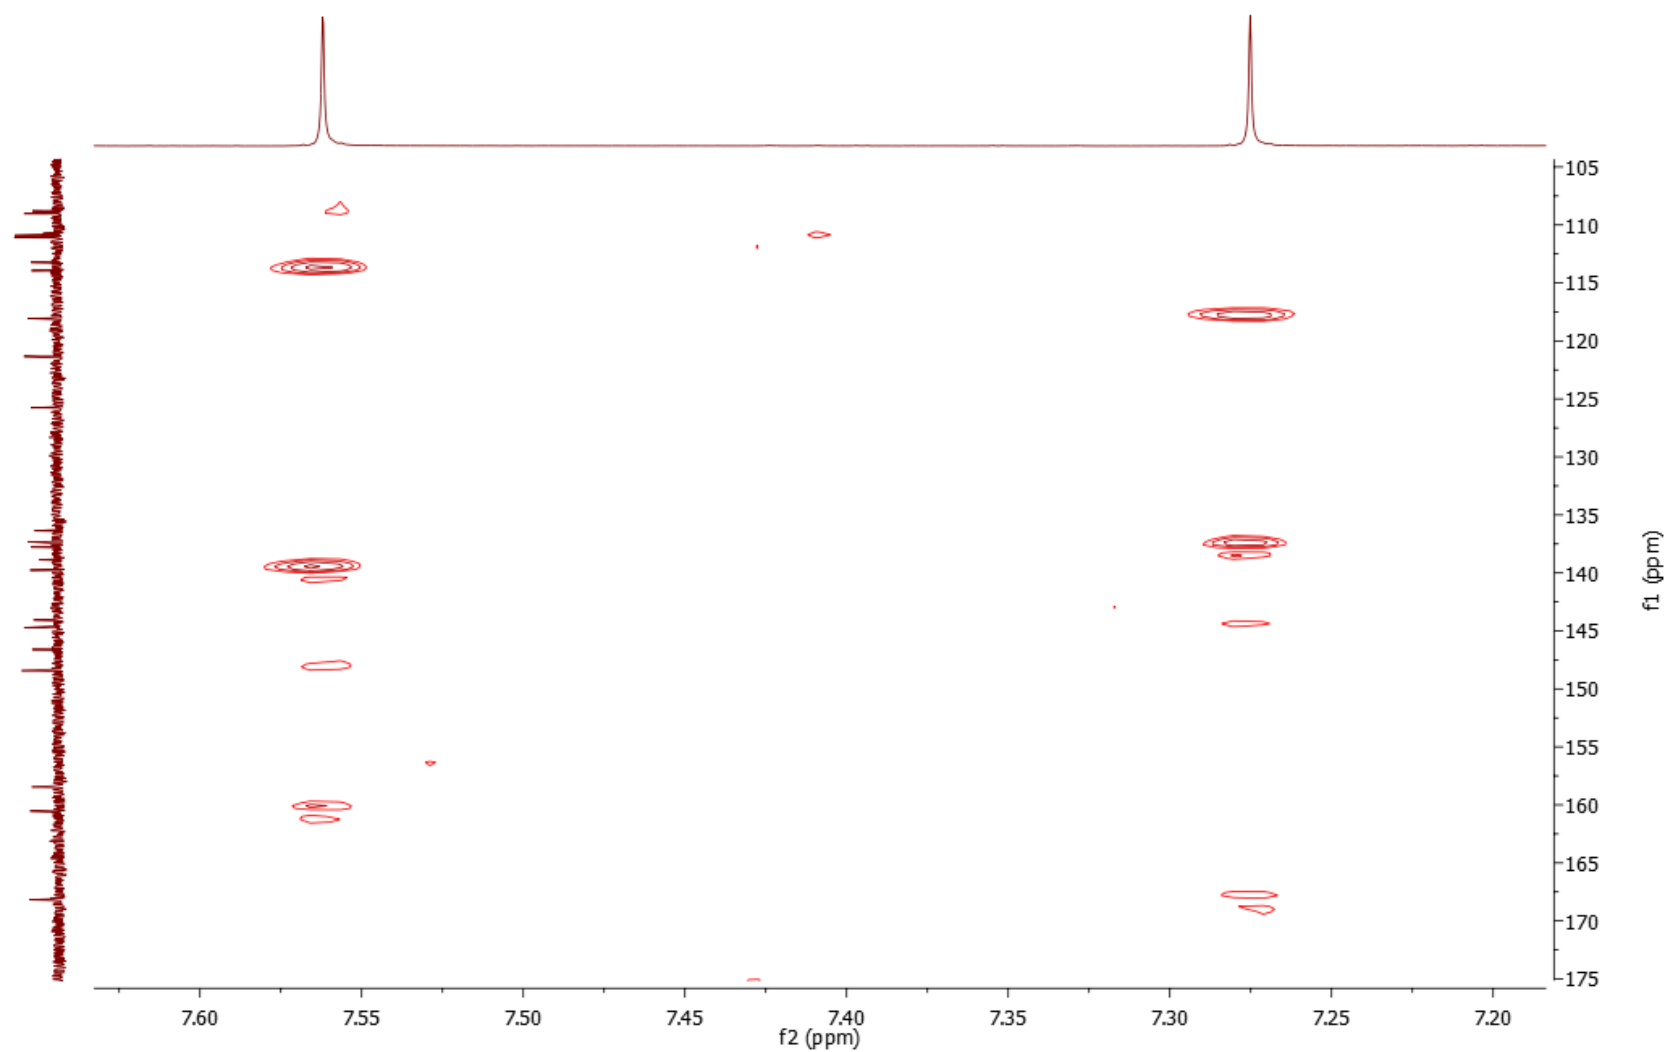

**Figure S19.** HMBC spectrum of compound **6** [acetone- $d_6$ /D $_2$ O, 9/1, v/v, 600 MHz]

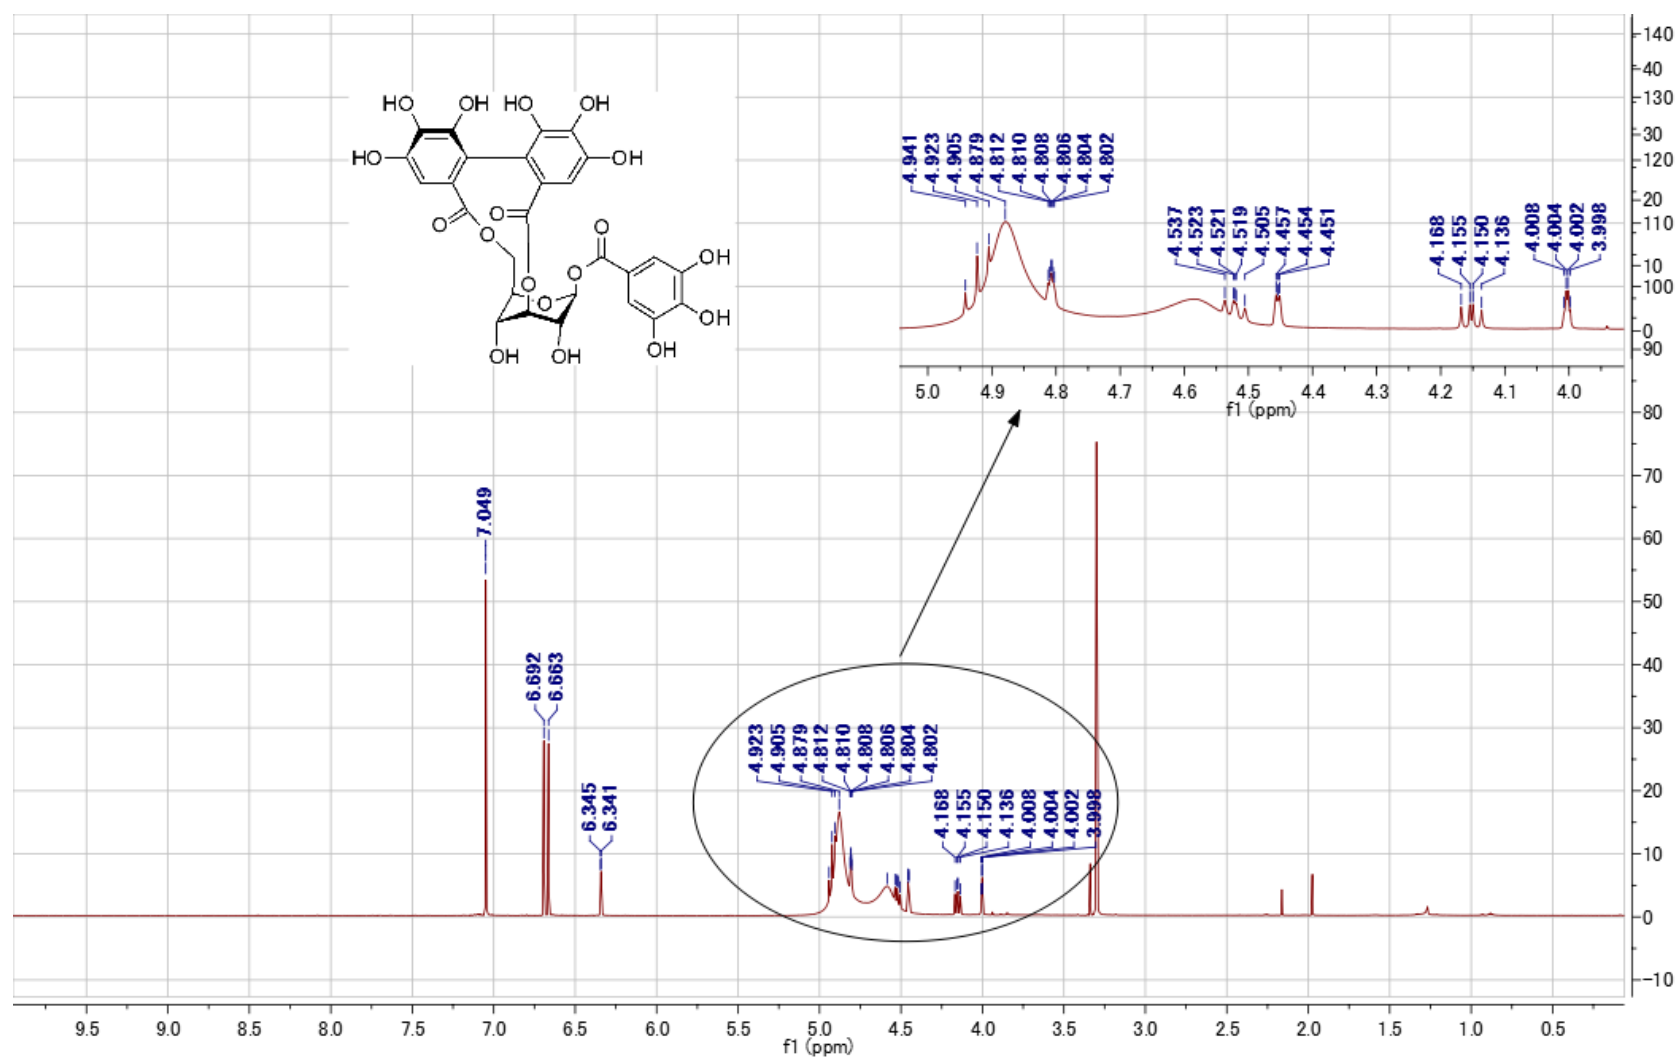

**Figure S20.** <sup>1</sup>H NMR spectrum of compound 7 [acetone-d<sub>6</sub>/D<sub>2</sub>O, 9/1, v/v, 600 MHz]

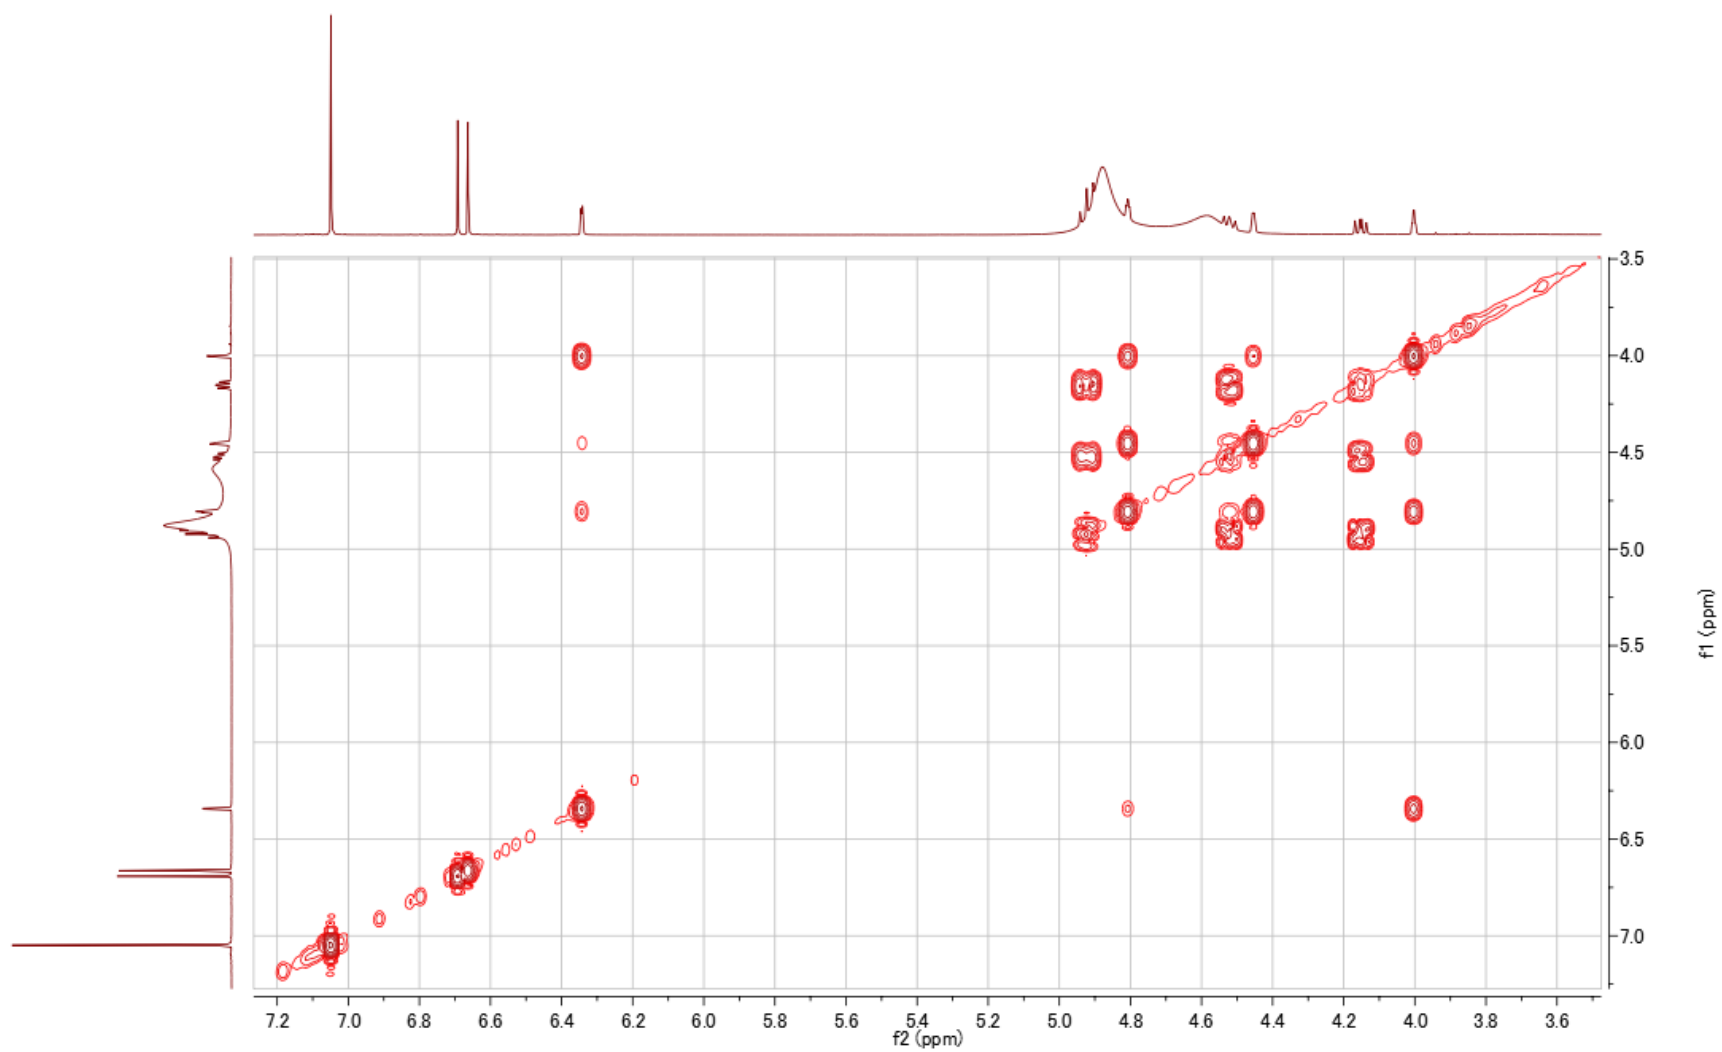

**Figure S21.**  ${}^1\text{H}$ - ${}^1\text{H}$  COSY spectrum of compound 7 [acetone- $d_6$ /D $_2$ O, 9/1, v/v, 600 MHz]



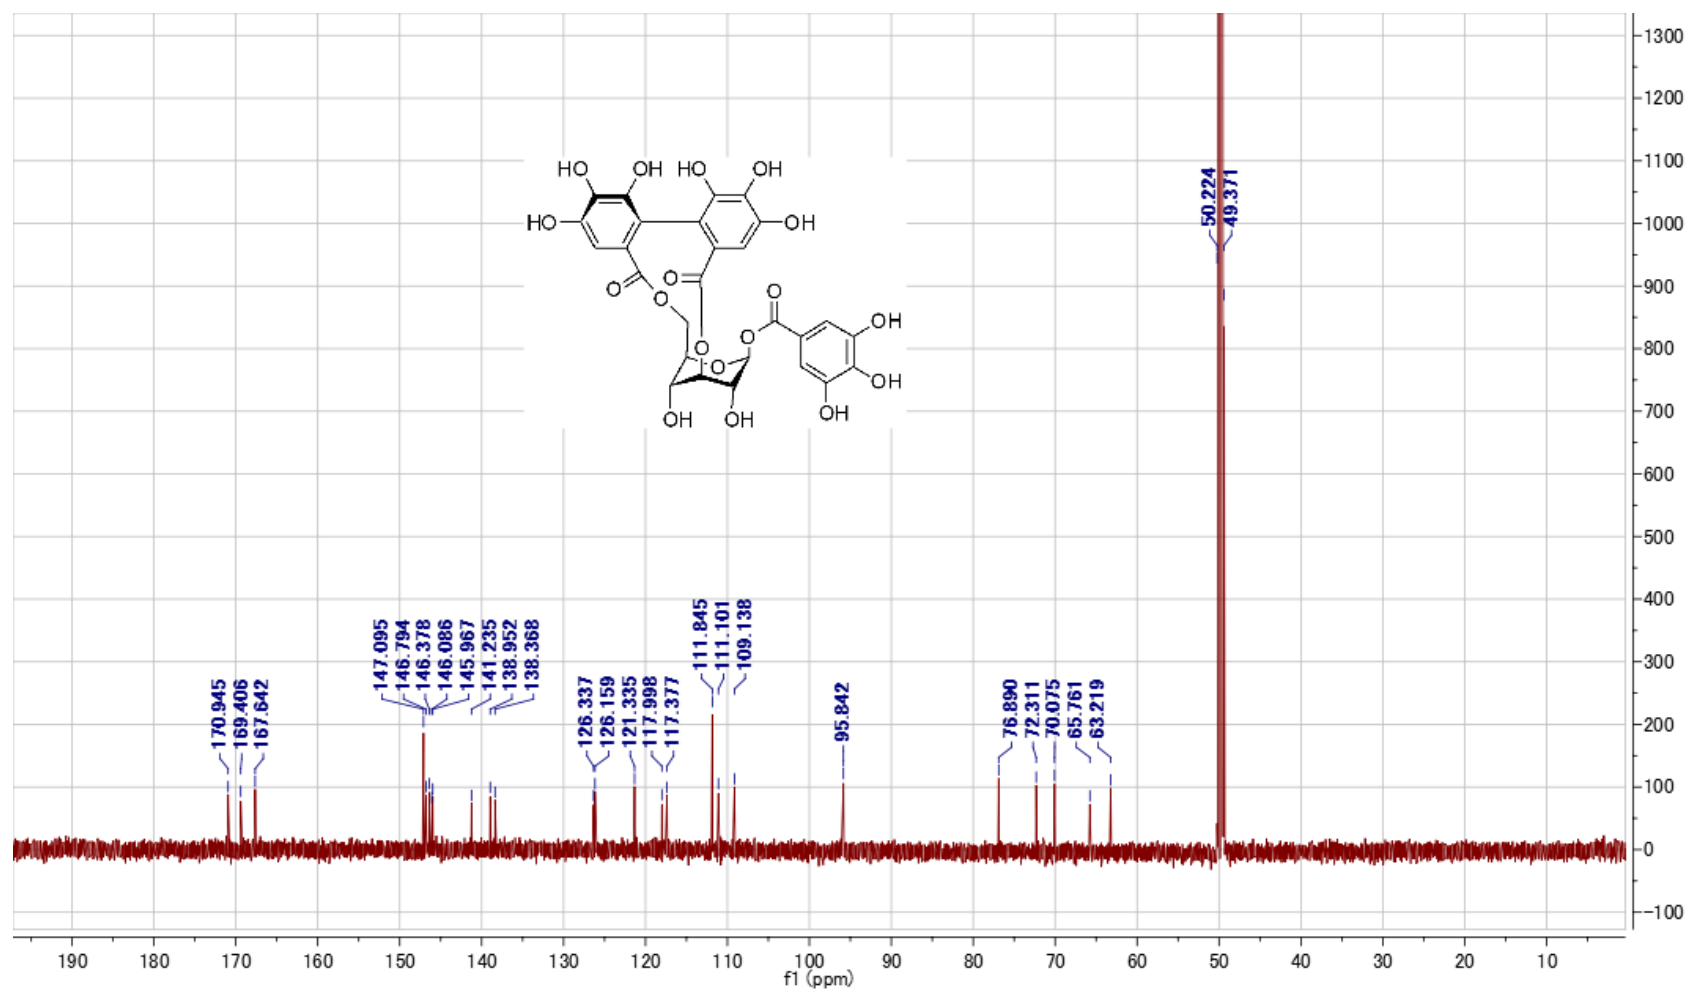

**Figure S22.**  $^{13}\text{C}$  NMR spectrum of compound 7 [acetone- $d_6/\text{D}_2\text{O}$ , 9/1, v/v, 151 MHz]

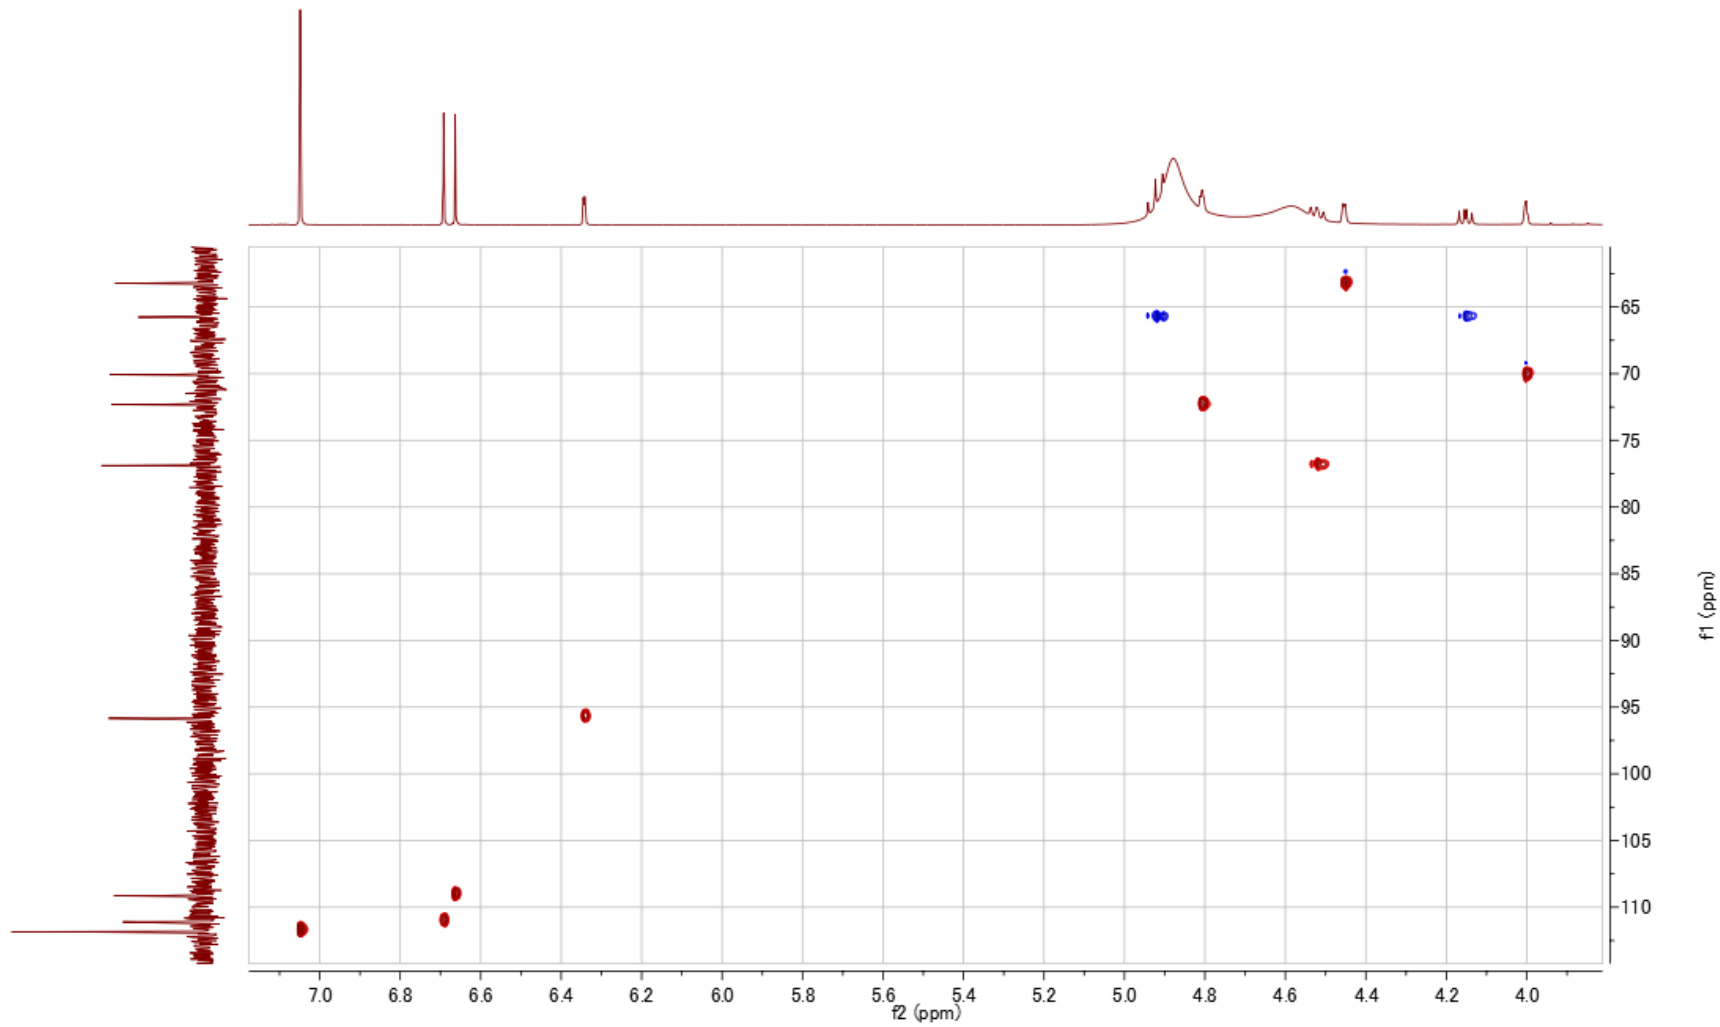

**Figure S23.** HSQC spectrum of compound 7 [acetone- $d_6$ /D $_2$ O, 9/1, v/v, 600 MHz]

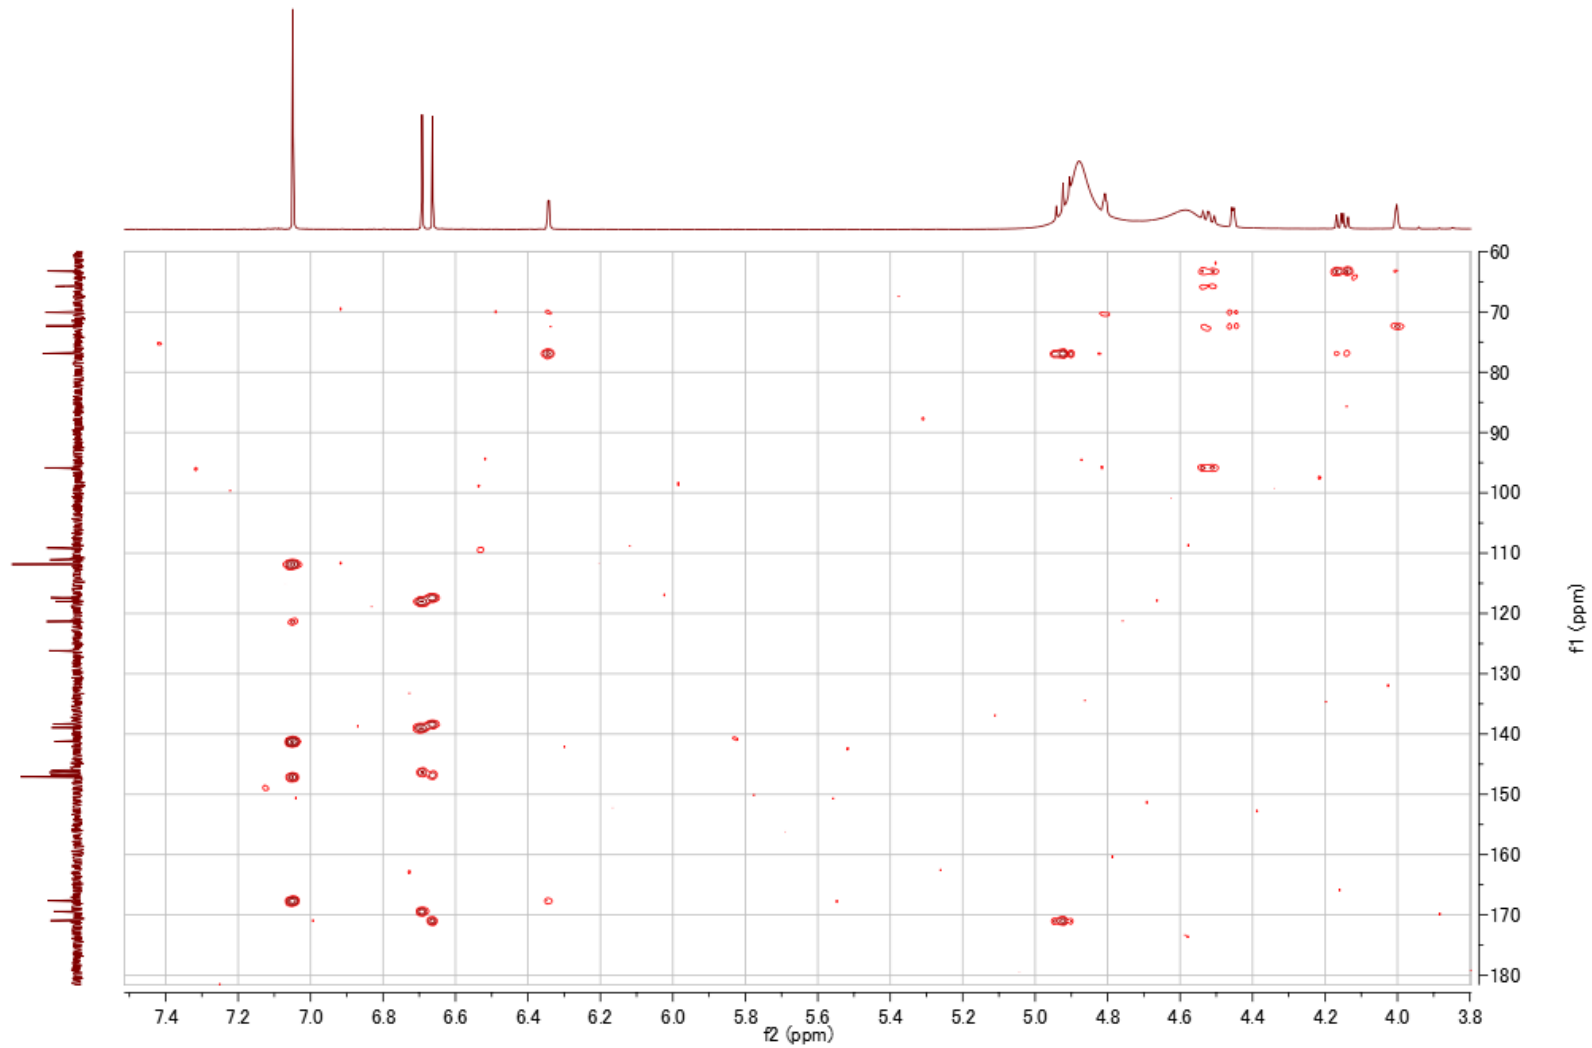

**Figure S24.** HMBC spectrum of compound **7** [acetone- $d_6$ /D<sub>2</sub>O, 9/1, v/v, 600 MHz]

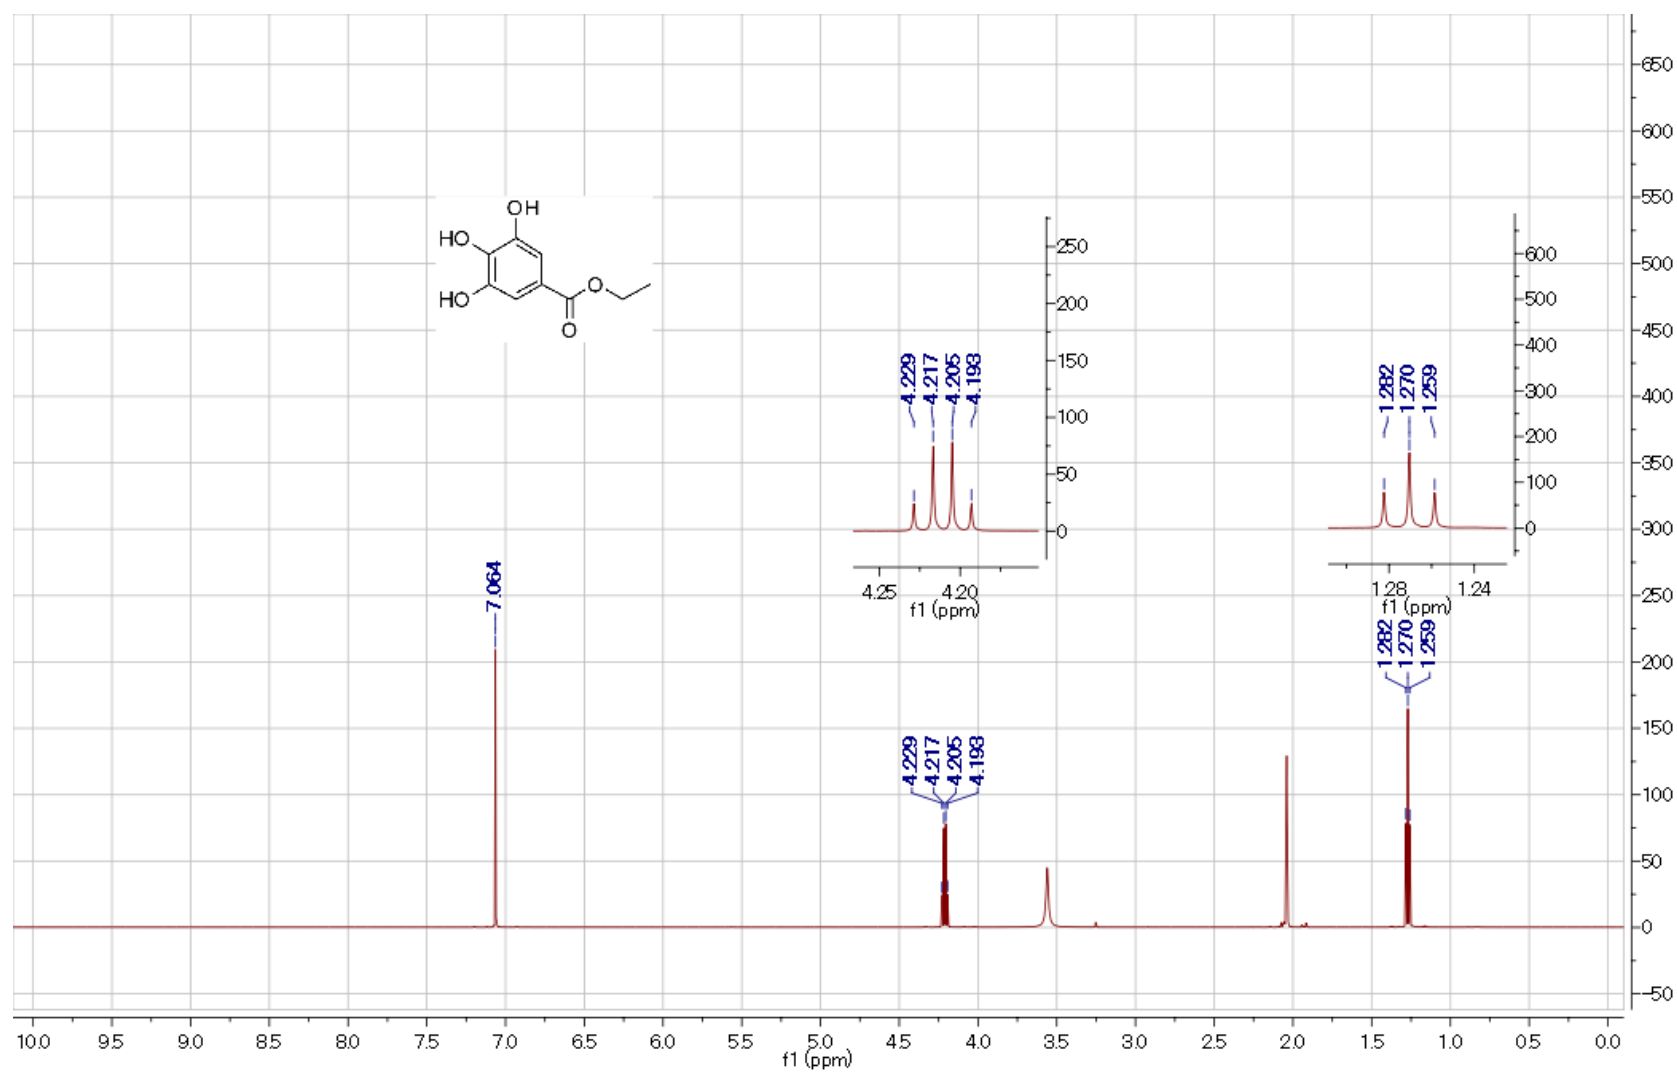

**Figure S25.** <sup>1</sup>H NMR spectrum of compound **8** [acetone-*d*<sub>6</sub>/D<sub>2</sub>O, 9/1, v/v, 600 MHz]

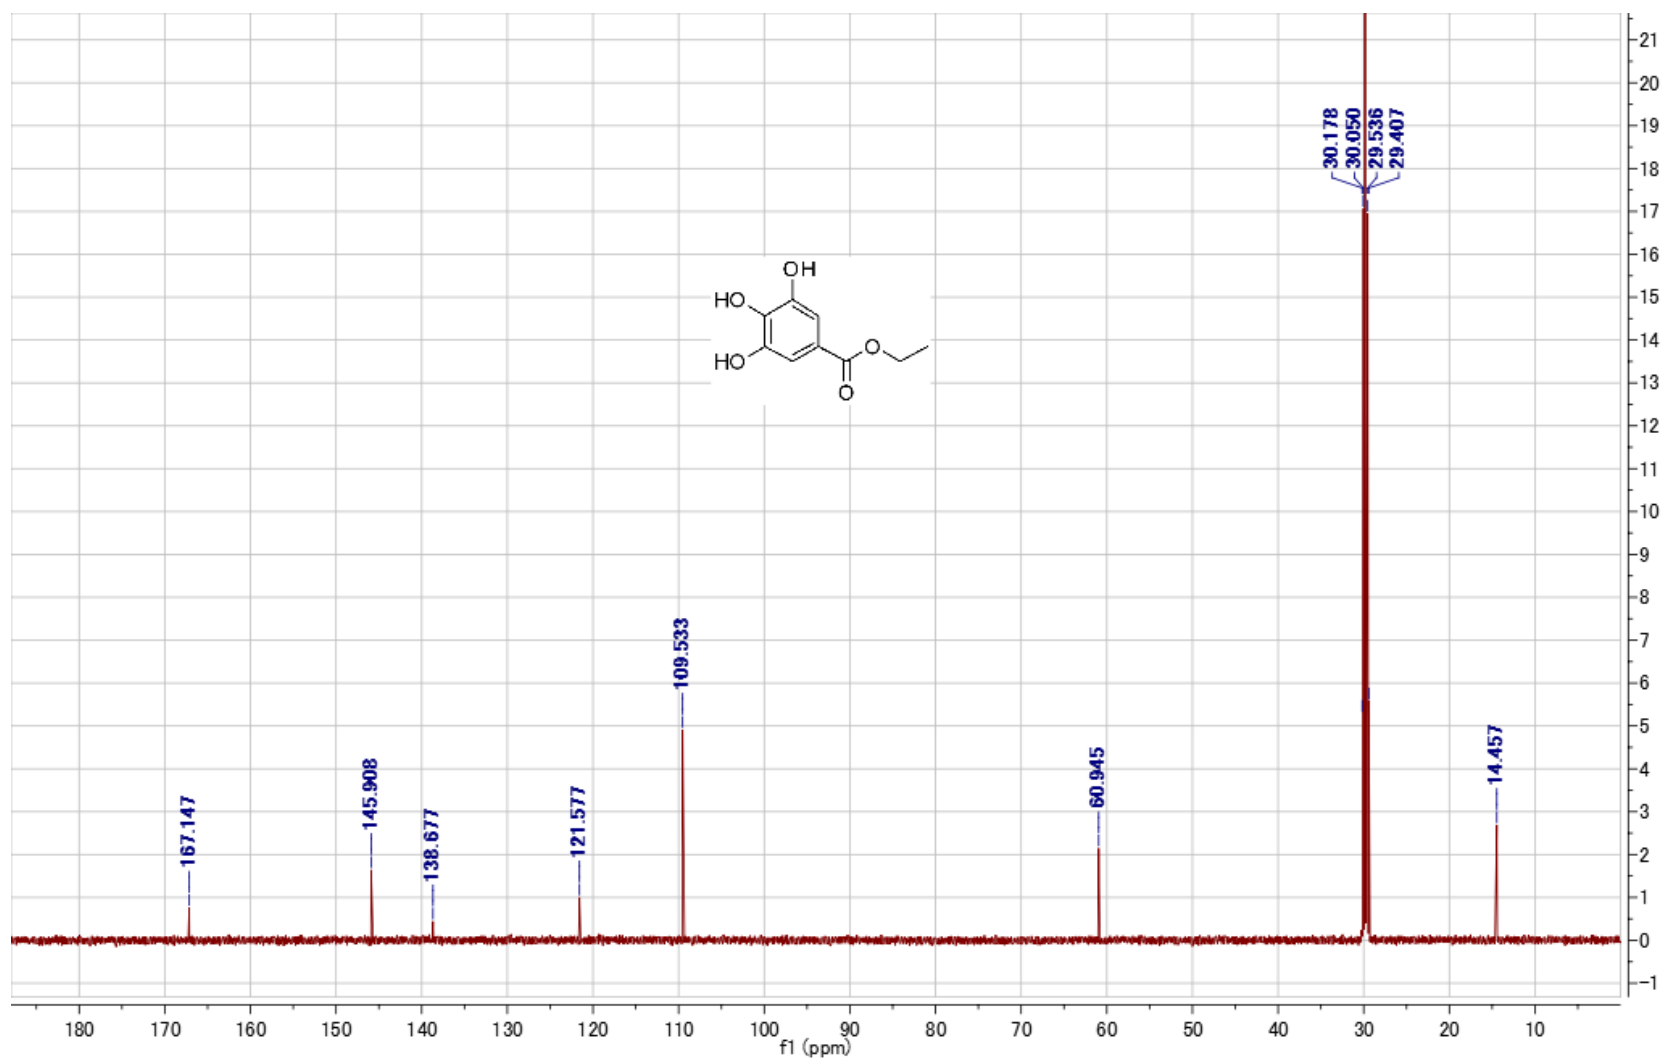

Figure S26. <sup>13</sup>C NMR spectrum of compound **8** [acetone-*d*<sub>6</sub>/D<sub>2</sub>O, 9/1, v/v, 151 MHz]

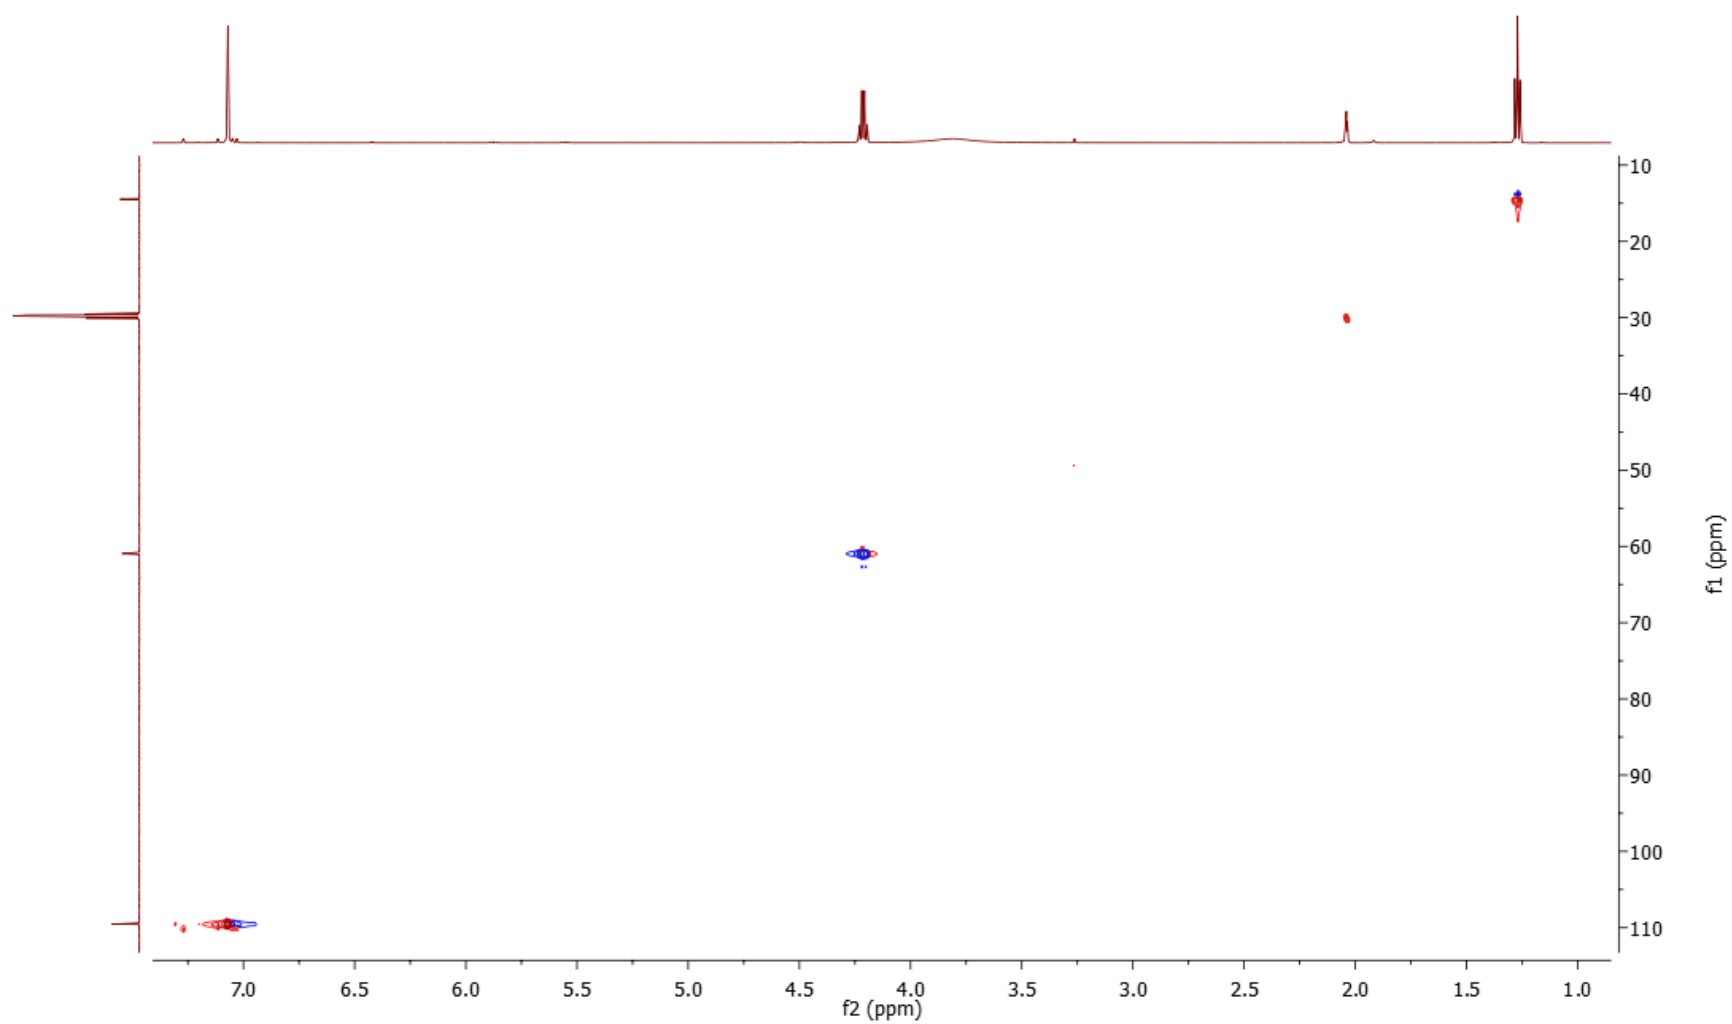

**Figure S27.** HSQC spectrum of compound **8** [acetone- $d_6$ /D<sub>2</sub>O, 9/1, v/v, 600 MHz]

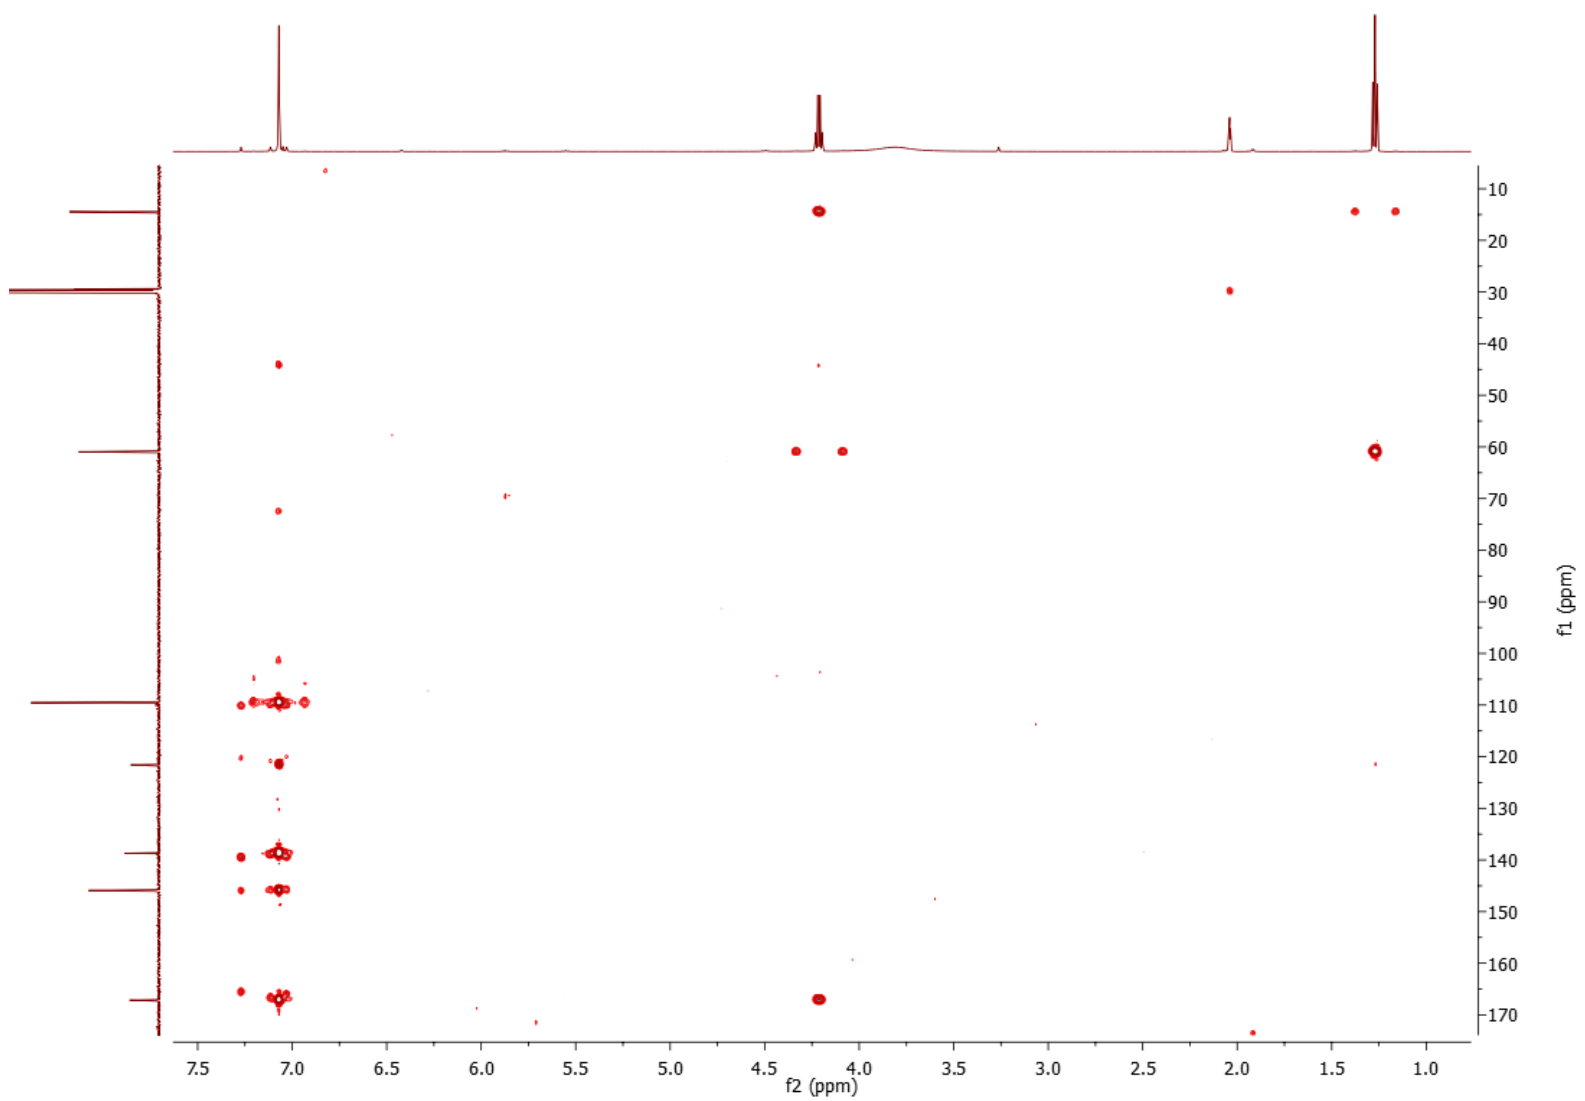

**Figure S28.** HMBC spectrum of compound **8** [acetone-*d*<sub>6</sub>/D<sub>2</sub>O, 9/1, *v/v*, 600 MHz]

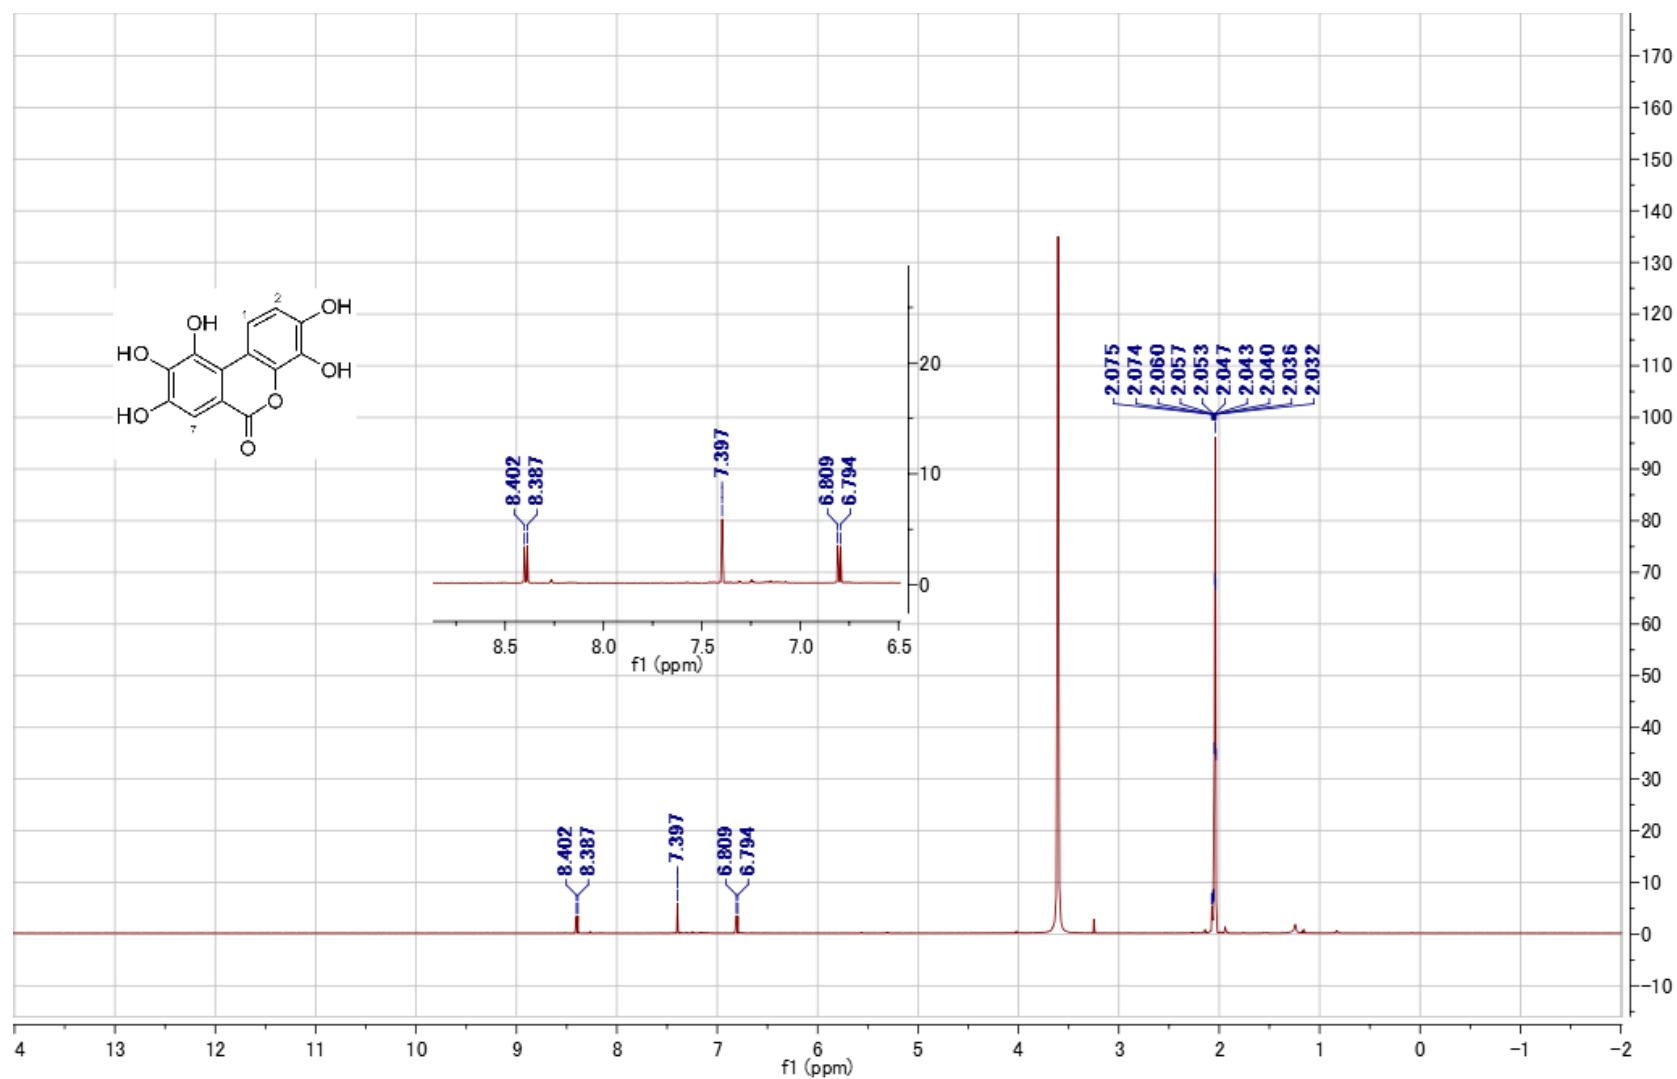

**Figure S29.**  $^1\text{H}$  NMR spectrum of compound **9** [ $\text{acetone-}d_6/\text{D}_2\text{O}$ , 9/1, v/v, 600 MHz]



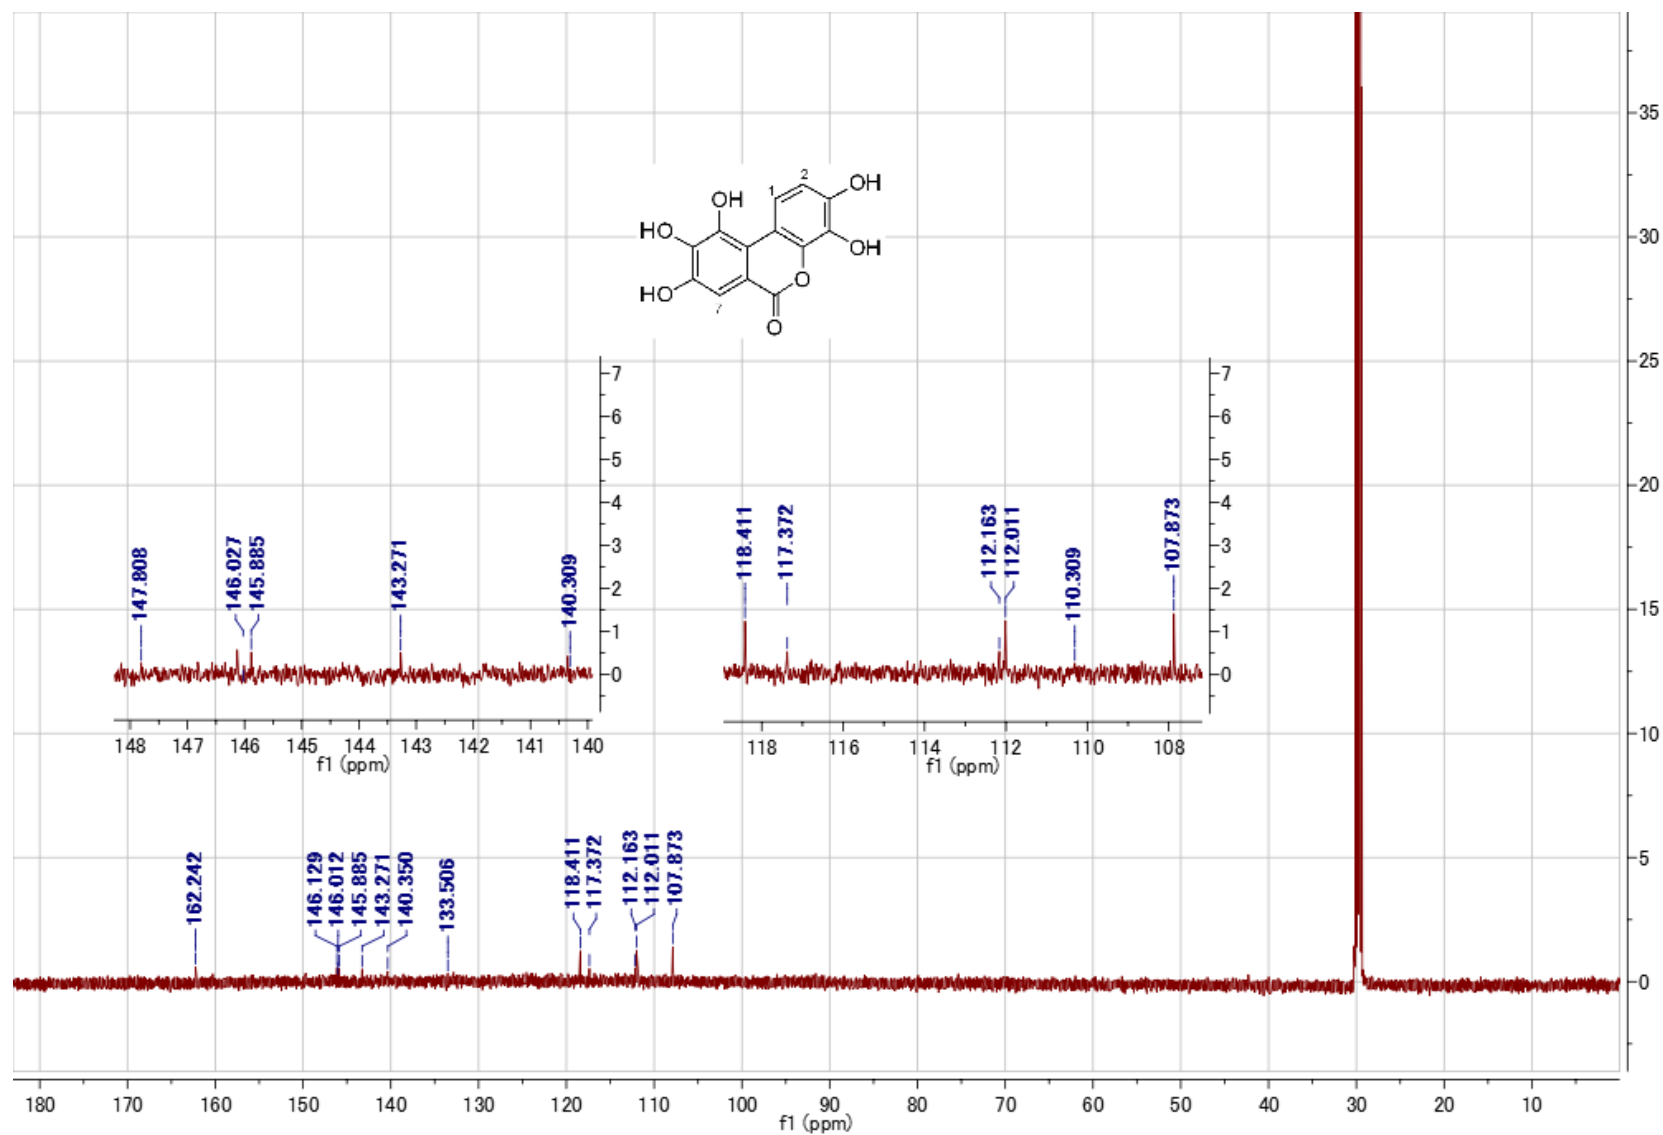

**Figure S30.**  $^{13}\text{C}$  NMR spectrum of compound 9 [acetone- $d_6$ /D $_2$ O, 9/1, v/v, 151 MHz]

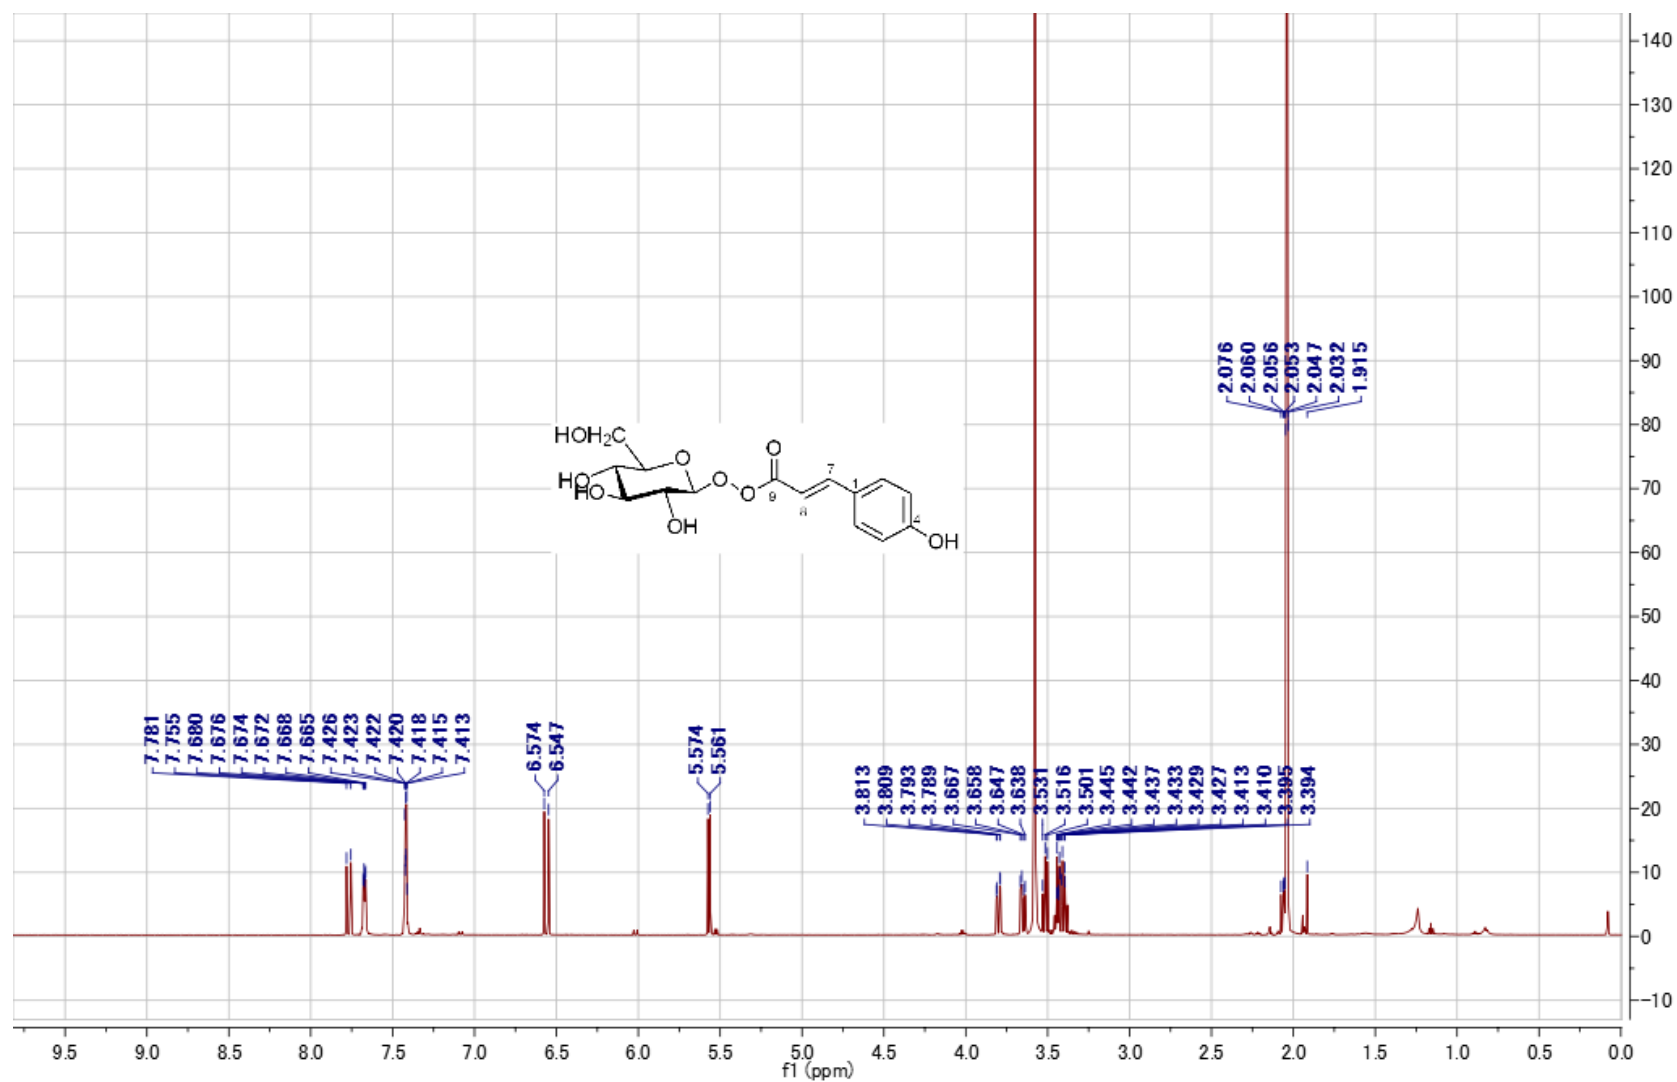

**Figure S31.** <sup>1</sup>H NMR spectrum of compound **10** [acetone-*d*<sub>6</sub>/D<sub>2</sub>O, 9/1, v/v, 600 MHz]

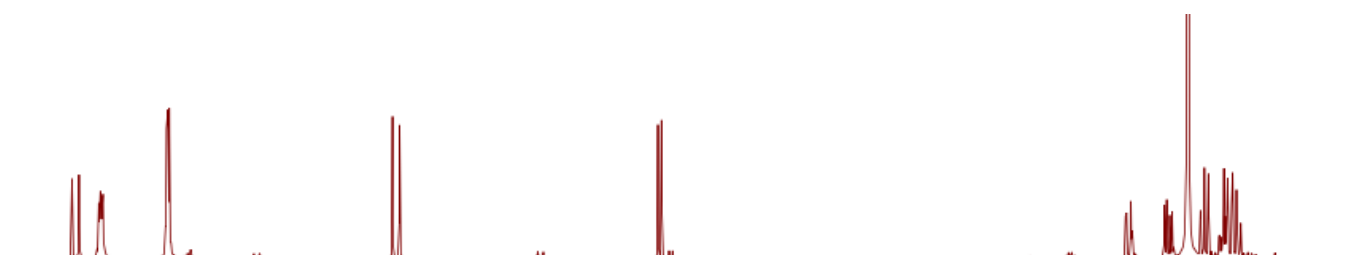

S35

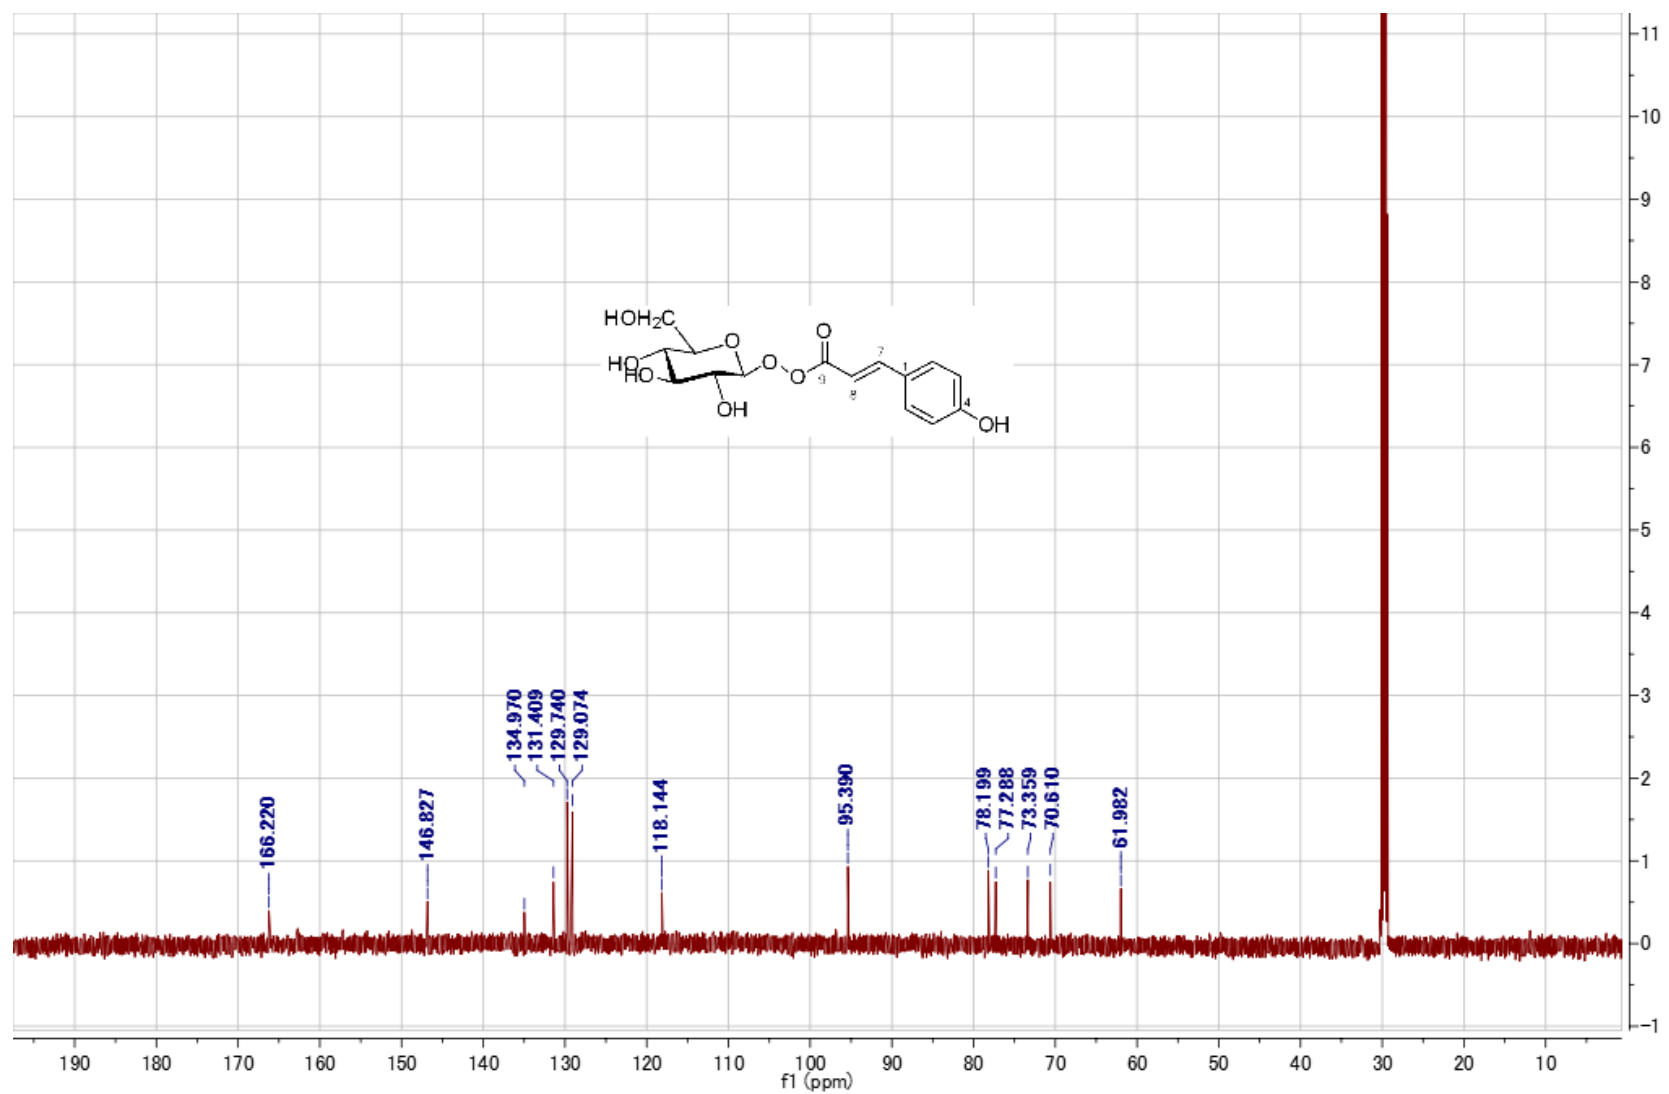

**Figure S33.** <sup>13</sup>C NMR spectrum of compound **10** [acetone-*d*<sub>6</sub>/D<sub>2</sub>O, 9/1, v/v, 151 MHz]

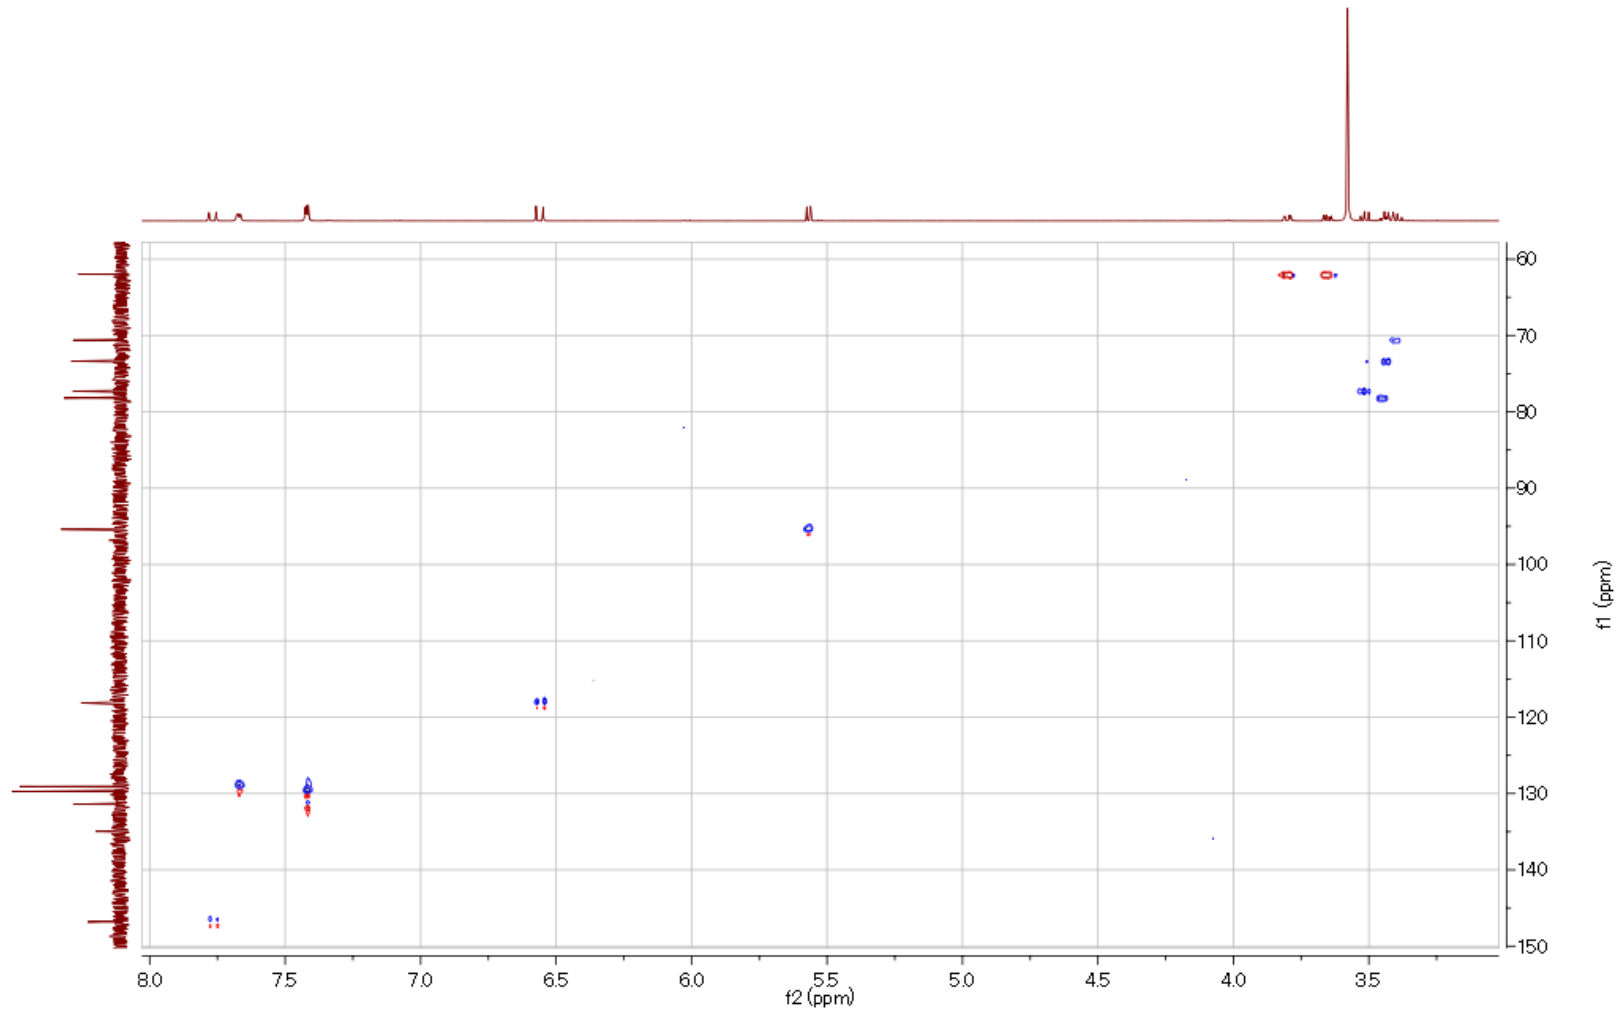

**Figure S34.** HSQC spectrum of compound **10** [acetone- $d_6$ /D $_2$ O, 9/1, v/v, 600 MHz]

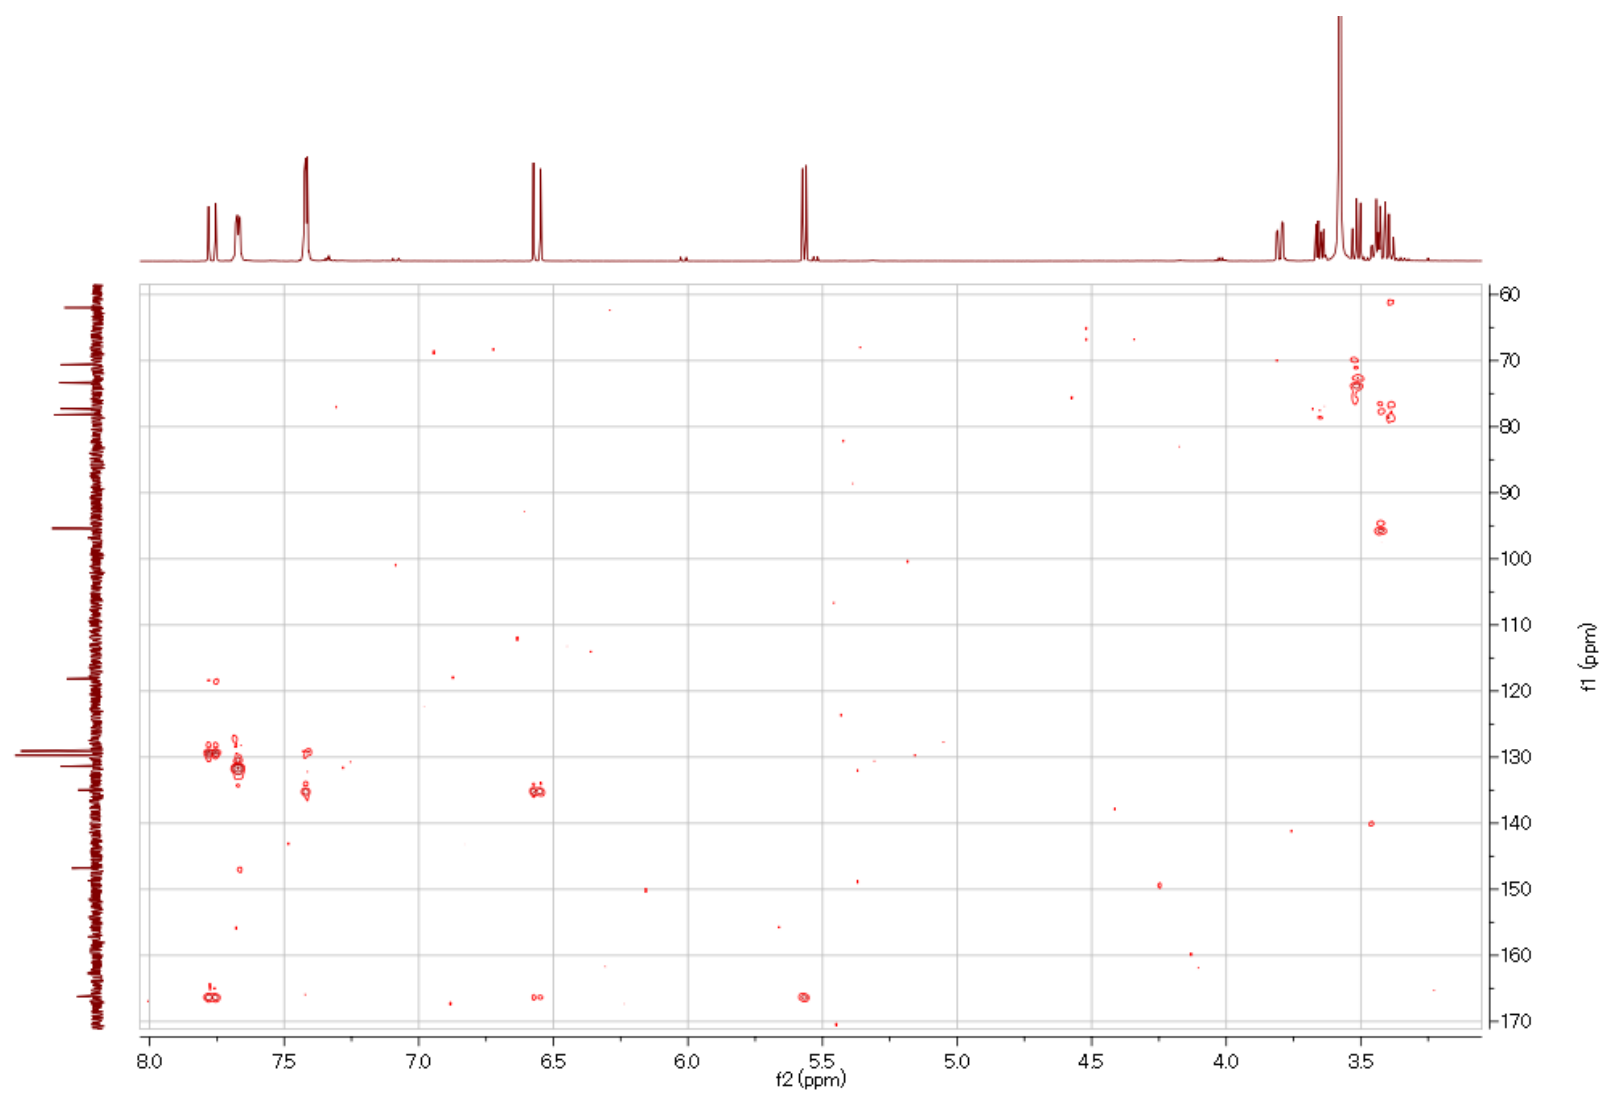

**Figure S35.** HMBC spectrum of compound **10** [acetone- $d_6$ /D $_2$ O, 9/1, v/v, 600 MHz]

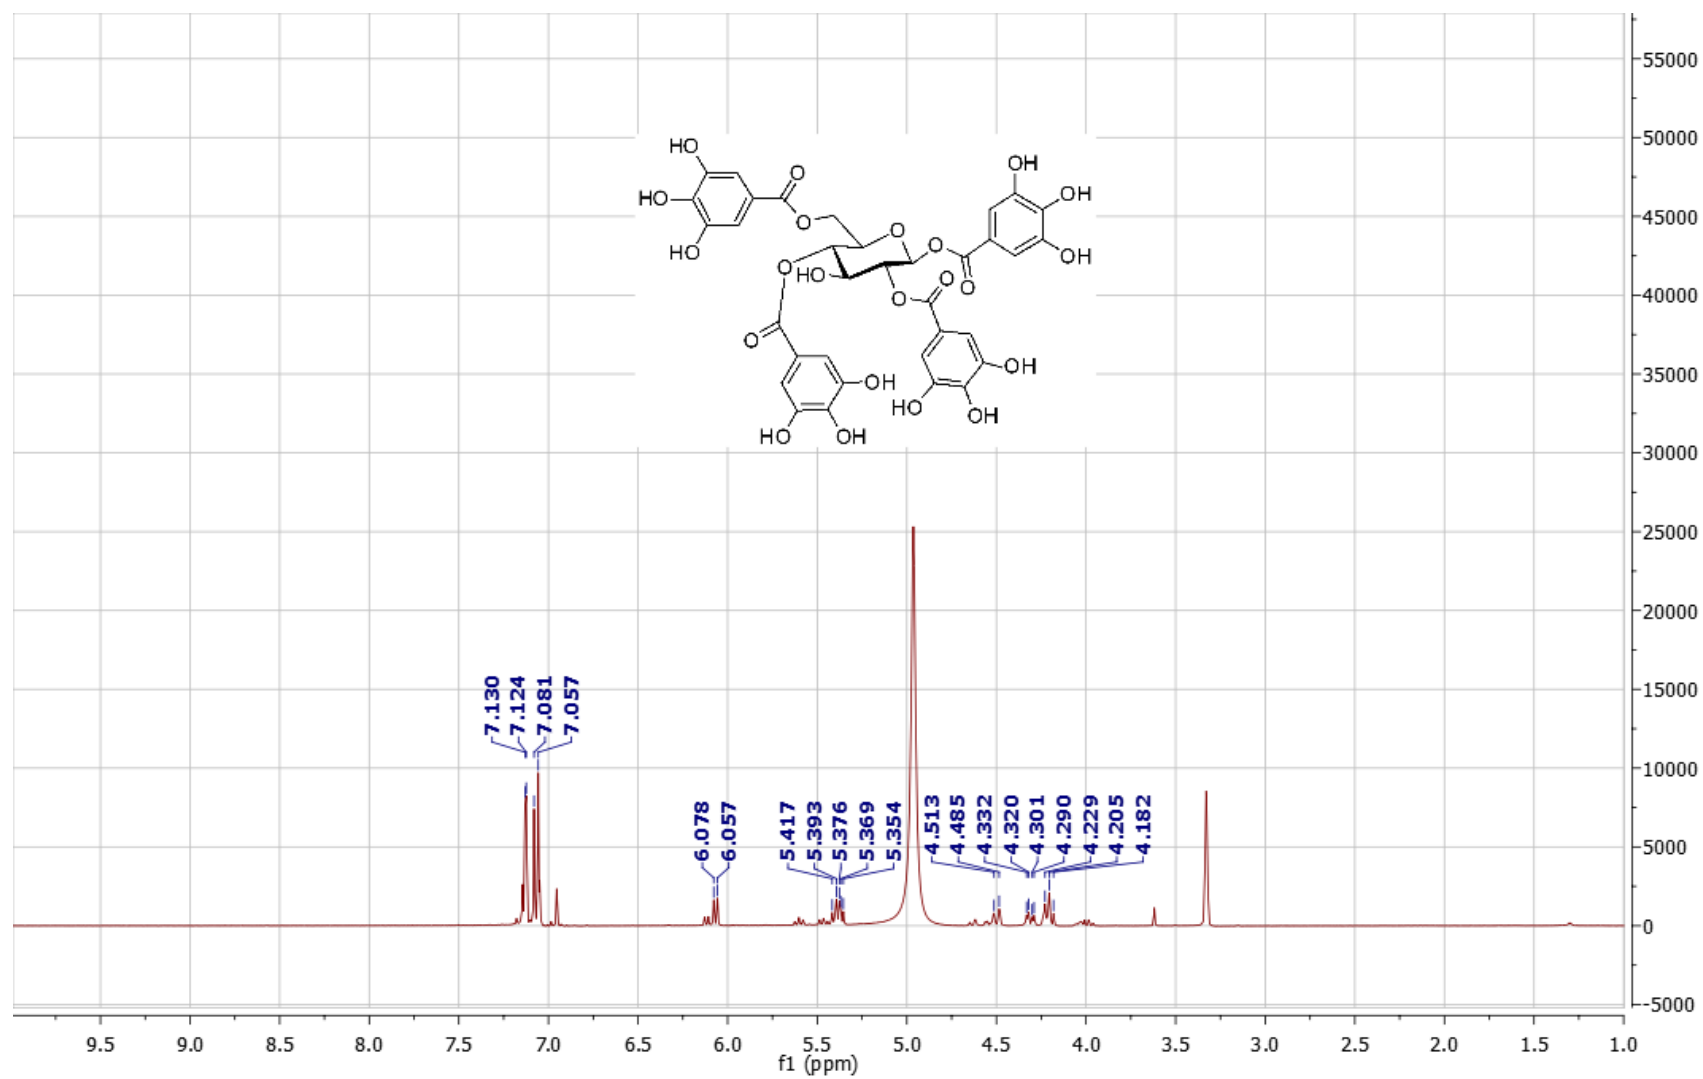

**Figure S36.**  $^1\text{H}$  NMR spectrum of compound **11** (CD<sub>3</sub>OD, 100 MHz)

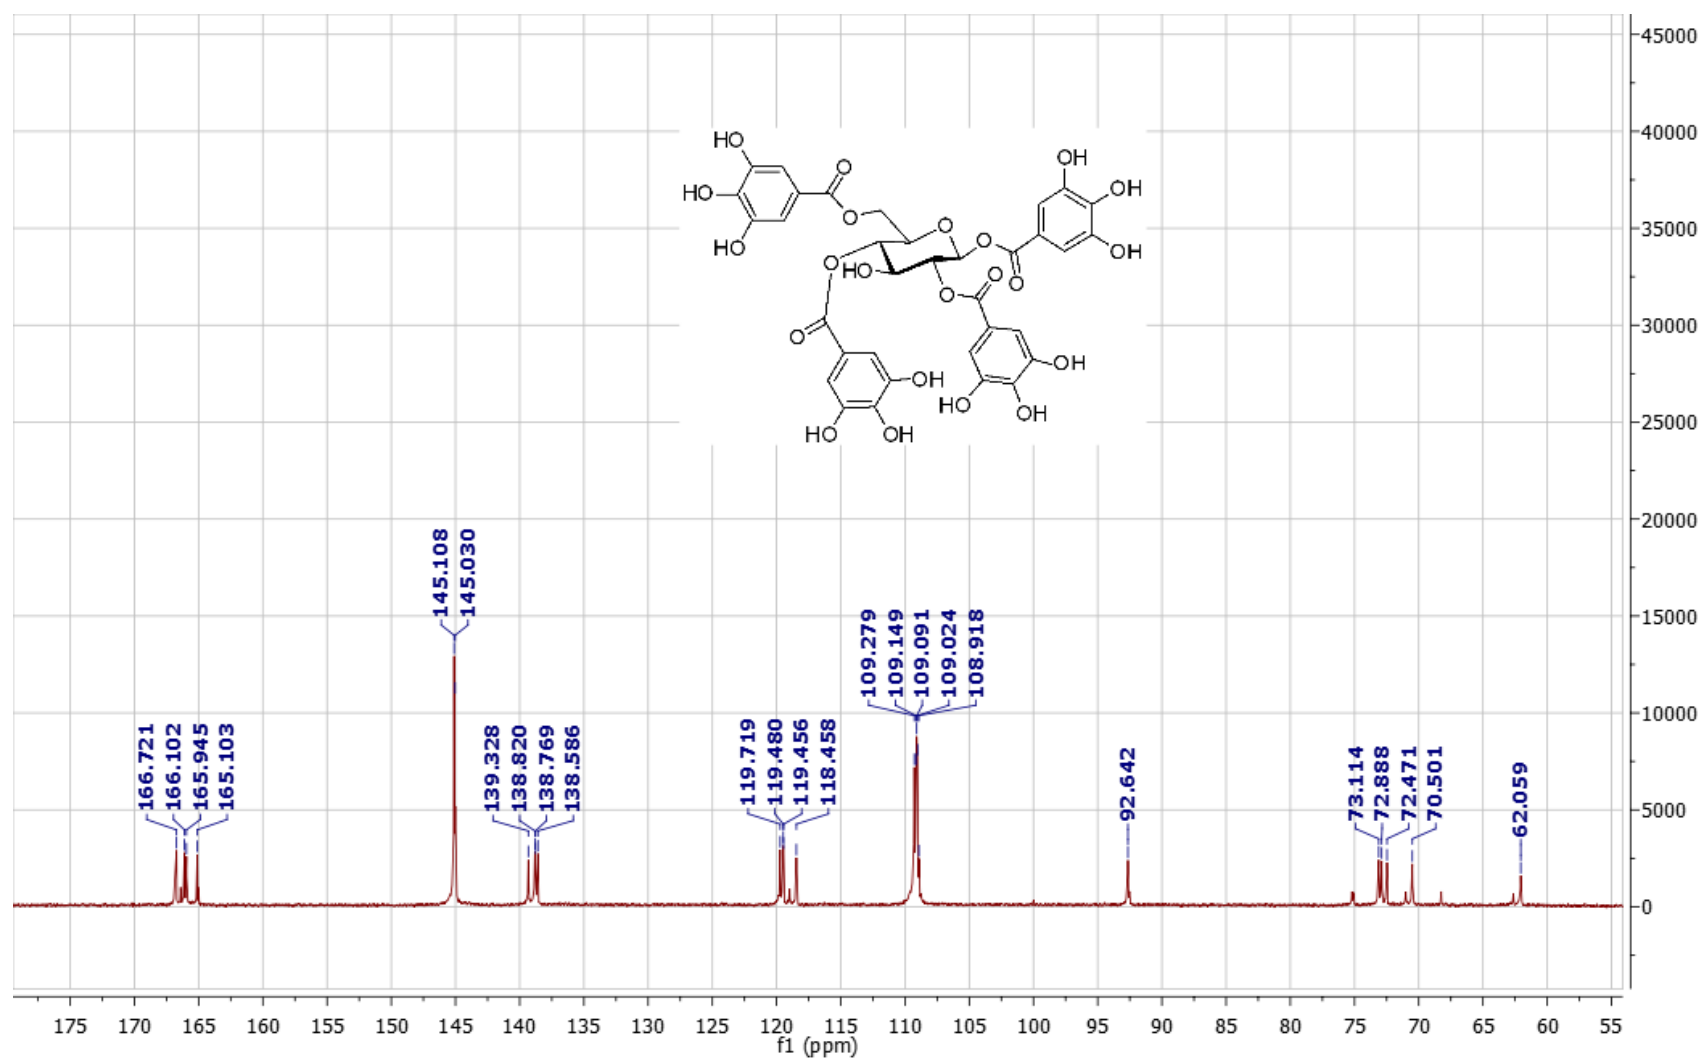

**Figure S37.** <sup>13</sup>C NMR spectrum of compound **11** (CD<sub>3</sub>OD, 100 MHz)
